# Supplementary material for: The origins and evolution of chromosomes, dosage compensation, and mechanisms underlying venom regulation in snakes
Source: PubMed Central journal article supplement — Genome Res. 2019 Apr;29(4):590–601. doi: 10.1101/gr.240952.118 (PMC6442385; doi:10.1101/gr.240952.118), 2019-04
Supplement: supp_gr.240952.118_Supplemental_Material_1.pdf [file supp_gr.240952.118_Supplemental_Material_1.pdf]

1 **SUPPLEMENTAL MATERIALS**

2 **Table of Contents**

3 1. Supplementary Methods ..... 2

4 2. Supplemental Tables ..... 23

5 3. Supplemental Figures ..... 37

## 6 1. SUPPLEMENTARY METHODS

### 7 **Prairie Rattlesnake Genome Sequencing and Assembly**

8 A male Prairie Rattlesnake (*Crotalus viridis viridis*) collected from a wild population in Colorado was  
9 used to generate the genome sequence. This specimen was collected and humanely euthanized according  
10 to University of Northern Colorado Institutional Animal Care and Use Committee protocols 0901C-SM-  
11 MLChick-12 and 1302D-SM-S-16. Colorado Parks and Wildlife scientific collecting license 12HP974  
12 issued to S.P. Mackessy authorized collection of the animal. Genomic DNA was extracted using a  
13 standard Phenol-Chloroform-Isoamyl alcohol extraction from liver tissue that was snap frozen in liquid  
14 nitrogen. Multiple short-read sequencing libraries were prepared and sequenced on various platforms,  
15 including 50bp single-end and 150bp paired-end reads on an Illumina GAI, 100bp paired-end reads on an  
16 Illumina HiSeq, and 300bp paired-end reads on an Illumina MiSeq. Long insert libraries were also  
17 constructed by and sequenced on the PacBio platform. Finally, we constructed two sets of mate-pair  
18 libraries using an Illumina Nextera Mate Pair kit, with insert sizes of 3-5 kb and 6-8 kb, respectively.  
19 These were sequenced on two Illumina HiSeq lanes with 150bp paired-end sequencing reads. Short and  
20 long read data were used to assemble the previous genome assembly version CroVir2.0 (NCBI accession  
21 SAMN07738522). Details of these sequencing libraries are in Supplemental Table S1. Prior to assembly,  
22 reads were adapter trimmed using BBmap (Bushnell 2014) and we quality trimmed all reads using  
23 Trimmomatic v0.32 (Bolger et al. 2014). We used Meraculous (Chapman et al. 2011) and all short-read  
24 Illumina data to generate a contig assembly of the Prairie Rattlesnake. We then performed a series of  
25 scaffolding and gap-filling steps. First, we used L\_RNA\_scaffolder (Xue et al. 2013) to scaffold contigs  
26 using the complete transcriptome assembly (see below), SSPACE Standard (Boetzer et al. 2010) to  
27 scaffold contigs using mate-pair reads, and SSPACE Longread to scaffold using long PacBio reads. We  
28 then used GapFiller (Nadalin et al. 2012) to extend contigs and fill gaps using all short-read data cross  
29 five iterations. We merged the scaffolded assembly with a contig assembly generated using the *de novo*  
30 assembly tool in CLC Genomics Workbench (Qiagen Bioinformatics, Redwood City, CA, USA).

31 We improved the CroVir2.0 assembly using the Dovetail Genomics HiRise assembly v2.1.3-  
32 59a1db48d61f method (Putnam et al. 2016), leveraging both Chicago and Hi-C sequencing. This  
33 assembly method has been used to improve numerous draft genome assemblies (e.g., Jiao et al. 2017;  
34 Rice et al. 2017). Chicago assembly requires large amounts of high molecular weight DNA from a very  
35 fresh tissue sample. We thus extracted high molecular weight genomic DNA from a liver of a closely  
36 related male to the CroVir2.0 animal (i.e., from the same den site). This animal was collected and  
37 humanely euthanized according to the Colorado Parks and Wildlife collecting license and UNC IACUC

38 protocols detailed above. Hi-C sequencing data were derived from the venom gland of the same animal  
39 (see details below on venom gland Hi-C and RNA-seq experimental design). The assembly was carried  
40 out using the existing CroVir2.0 draft genome assembly, short read data used in the previous assembly,  
41 Chicago, and Hi-C datasets. The HiRise assembly method then mapped Chicago and Hi-C datasets to the  
42 draft assembly and generated a model fit of the data based on insert size distributions (Supplemental Fig.  
43 S1; Supplemental Material 2). Models were generated with read pairs that mapped within the same  
44 scaffold and were used in successive join, break, and final join phases of the pipeline to perform final  
45 scaffolding. Dovetail Genomics HiRise assembly resulted in a highly contiguous genome assembly  
46 (CroVir3.0) with a physical coverage of greater than 1,000× (Supplemental Table S2).

47 We estimated the size of the genome using  $k$ -mer frequency distributions (19, 23, and 27mers) quantified  
48 using Jellyfish (Marçais and Kingsford 2011). Raw Illumina 100bp paired-end reads (Supplemental Table  
49 S1) were quality trimmed using Trimmomatic (Bolger et al. 2014) using the settings LEADING:10,  
50 TRAILING:10, SLIDINGWINDOW:4:15, and MINLEN:36. The total number of output sequences and  
51 bases were 400,983,222 and 38,471,185,282, respectively. Quality trimmed reads were then used for  
52 Jellyfish  $k$ -mer counting, and the Jellyfish  $k$ -mer table output per  $k$ -mer was used to estimate genome size  
53 with GCE (Liu et al. 2013).

54 We generated transcriptomic libraries from RNA sequenced from 16 different tissues: two venom gland  
55 tissues; 1 day and 3 days post-venom extraction (see Hi-C and RNA sequencing of Venom Gland section  
56 below), one from pancreas, and one from tongue were taken from the Hi-C sequenced genome animal.  
57 Additional samples from other individuals included a third venom gland sample from which venom had  
58 not been extracted ('unextracted venom gland'), three liver, three kidney, two pancreas, and one each of  
59 skin, lung, testis, accessory venom gland, shaker muscle, brain, stomach, ovaries, rectal gland, spleen, and  
60 blood tissues. Total RNA was extracted using Trizol, and we prepared RNAseq libraries using an NEB  
61 RNA-seq kit for each tissue, which were uniquely indexed and run on multiple HiSeq 2500 lanes using  
62 100bp paired-end reads (Supplemental Table S3). We used Trinity v. 20140717 (Grabherr et al. 2011)  
63 with default settings and the '--trimmomatic' setting to assemble transcriptome reads from all tissues. The  
64 resulting assembly contained 801,342 transcripts comprising 677,921 Trinity-annotated genes, with an  
65 average length of 559 bp and an N50 length of 718 bp.

## 66 **Repeat Element Analysis**

67 Annotation of repeat elements was performed using homology-based and *de novo* prediction approaches.  
68 Homology-based methods of transposable element identification (e.g., *RepeatMasker*) cannot recognize

69 elements that are not in a reference database, and have low power to identify fragments of repeat elements  
70 belonging to even moderately diverged repeat families (Platt et al. 2016). Since the current release of the  
71 Tetrapoda RepBase library (v.20.11, August 2015; Bao et al. 2015) is unsuitable for detailed repeat  
72 element analyses of most squamate reptile genomes, we performed *de novo* identification of repeat  
73 elements on 6 snake genomes (*Crotalus viridis*, *Crotalus mitchellii*, *Thamnophis sirtalis*, *Boa constrictor*,  
74 *Deinagkistrodon acutus*, and *Pantherophis guttatus*) in RepeatModeler v.1.0.9 (Smit and Hubley 2015)  
75 using default parameters. Consensus repeat sequences from multiple species were combined into a large  
76 joint snake repeat library that also includes previously identified elements from an additional 12 snake  
77 species (Castoe et al. 2013). All genomes were annotated with the same library with the exception of the  
78 green anole lizard, for which we used a lizard specific library that includes *de novo* repeat identification  
79 for *Pogona vitticeps*, *Ophisaurus gracilis*, and *Gekko japonicus*. To verify that only repeat elements were  
80 included in the custom reference library, all sequences were used as input in a BLASTx search against the  
81 SwissProt database (UniProt 2017), and those clearly annotated as protein domains were removed.  
82 Finally, redundancy and possible chimeric artifacts were removed through clustering methods in CD-HIT  
83 (Li and Godzik 2006) using a threshold of 0.85.

84 Homology-based repeat element annotation was performed in RepeatMasker v.4.0.6 (Smit et al. 2015)  
85 using a PCR-validated BovB/CR1 LINE retrotransposon consensus library (Castoe et al. 2013), the  
86 Tetrapoda RepBase library, and our custom library as references. Output files were post-processed using a  
87 modified implementation of the ProcessRepeat script (RepeatMasker package).

## 88 Gene Annotation

89 We used MAKER v. 2.31.8 (Cantarel et al. 2008) to annotate protein-coding genes in an iterative fashion.  
90 Several sources of empirical evidence of protein-coding genes were used, including the full *de novo* *C.*  
91 *viridis* transcriptome assembly and protein datasets consisting of all annotated proteins from NCBI for  
92 *Anolis carolinensis* (Alfoldi et al. 2011), *Python molurus bivittatus* (Castoe et al. 2013), *Thamnophis*  
93 *sirtalis* (Perry et al. 2018), and *Ophiophagus hannah* (Vonk et al. 2013), and from GigaDB for  
94 *Deinagkistrodon acutus* (Yin et al. 2016). We also included 422 protein sequences for 24 known venom  
95 gene families that were used to infer *Python* venom gene homologs in a previous study (Reyes-Velasco et  
96 al. 2015). Prior to running MAKER, we used BUSCO v. 2.0.1 (Simão et al. 2015) and the full *C. viridis*  
97 genome assembly to iterative train AUGUSTUS v. 3.2.3 (Stanke and Morgenstern 2005) HMM models  
98 based on 3,950 tetrapod vertebrate benchmarking universal single-copy orthologs (BUSCOs). We also ran  
99 this analysis on the previous genome assembly (CroVir2.0) as a comparison, and provide the details of  
100 these analyses in Supplemental Table S4. We ran BUSCO in the ‘genome’ mode and specified the ‘--

101 long' option to have BUSCO perform internal AUGUSTUS training. We ran MAKER with the  
102 'est2genome=0' and 'protein2genome=0' options set to produce gene models using the AUGUSTUS  
103 gene predictions with hints supplied from the empirical transcript and protein sequence evidence. We  
104 provided the coordinates for all interspersed, complex repetitive elements for MAKER to perform hard  
105 masking before evidence mapping and prediction, and we set the 'model\_org' option to 'simple' to have  
106 MAKER soft mask simple repetitive elements. We used default settings for all other options, except  
107 'max\_dna\_len' (set to 300,000) and 'split\_hit' (set to 20,000). We iterated this approach an additional  
108 time and we manually compared the MAKER gene models with the transcript and protein evidence. We  
109 found very little difference between the two gene annotations and based on a slightly better annotation  
110 edit distance (AED) distribution in the first round of MAKER, we used our initial round as the final gene  
111 annotation. The resulting annotation consisted of 17,486 genes and we ascribed gene IDs based on  
112 homology using reciprocal best-BLAST (with e-value thresholds of  $1 \times 10^{-5}$ ) and stringent one-way  
113 BLAST (with an e-value threshold of  $1 \times 10^{-8}$ ) searches against protein sequences from NCBI for *Anolis*,  
114 *Python*, and *Thamnophis*.

## 115 **Hi-C and RNA Sequencing of the Venom Gland**

116 We dissected the venom glands from the Hi-C *Crotalus viridis viridis* 1 day and 3 days after venom was  
117 initially extracted in order to track a time-series of venom production. A subsample of the 1-day venom  
118 gland was sent to Dovetail Genomics where DNA was extracted and replicate Hi-C sequencing libraries  
119 were prepared according to their protocol (see above). We also extracted total RNA from both 1-day and  
120 3-day venom gland samples, along with tongue and pancreas tissue from the Hi-C genome animal (see  
121 Sequencing and Assembly and Annotation sections above). mRNA-seq libraries were generated and  
122 sequenced at Novogene on two separate lanes of the Illumina HiSeq 4000 platform using 150 bp paired-  
123 end reads (Supplemental Table S3).

## 124 **Chromosome Identification and Synteny Analyses**

125 Genome assembly resulted in several large, highly-contiguous scaffolds with a relative size distribution  
126 consistent with the karyotype of *C. viridis* (Baker et al. 1972), representing nearly-complete chromosome  
127 sequences. We determined the identity of chromosomes using a BLAST search of the chromosome-  
128 specific markers linked to snake chromosomes from (Matsubara et al. 2006), downloaded from NCBI  
129 (accessions SAMN00177542 and SAMN00152474). We kept the best alignment per cDNA marker as its  
130 genomic location in the Prairie Rattlesnake genome, except when a marker hit two high-similarity  
131 matches on different chromosomes. The vast majority of markers linked to a specific macrochromosome

132 (i.e., Chromosomes 1-7; Supplemental Table S6) in *Elaphe quadrivirgata* mapped to a single genomic  
133 scaffold; only six of 104 markers did not map to the predicted chromosome from *E. quadrivirgata*.  
134 Possible reasons for unmatched chromosomal locations for these markers in *Elaphe* and the Prairie  
135 Rattlesnake include 1) original localizations in *Elaphe* that are unique to the species or were localized in  
136 error, 2) translocations have occurred, leading to divergent locations in each genome, or 3) misassembly  
137 errors in the rattlesnake genome assembly. To distinguish between these possibilities, we first identified  
138 the chromosomal location of each marker in the Anole Lizard (*Anolis carolinensis*) genome (Alfoldi et al.  
139 2011) to determine if their locations are expected based on *Elaphe-Anolis* synteny. Three markers mapped  
140 to unexpected chromosomes in *Anolis* (*NOSIP*, *GNAI2*, and *P4HB*), which instead matched syntenic  
141 locations in the rattlesnake (Supplemental Table S7). *Anolis* synteny for a fourth marker (*UCHLI*)  
142 suggested correct assembly in the rattlesnake, but was unclear because it mapped to *Anolis* Chromosome  
143 5, which is syntenic with both snake Chromosomes 6 and 7 (Fig. 1). To determine if the two remaining  
144 markers (*ZNF326* and *KLF6*) were placed on unexpected chromosomes due to misassembly, and to  
145 identify further evidence that the other markers were assembled correctly, we leveraged our  
146 intrachromosomal Hi-C data to deeply investigate contact patterns around these markers. Specifically, we  
147 plotted heatmaps of  $\log_{10}$  normalized contact frequencies in 10 kb bins using R (R Core Team 2017).  
148 Regional dropout in intrachromosomal contact frequencies in the focal regions would be expected if  
149 mismatched chromosome locations were due to misassembly in the rattlesnake. We focused our searches  
150 on genomic intervals around each of the six focal genes and the nearest confirmed marker from  
151 Supplemental Table S6. The genomic region around each gene showed intrachromosomal contact  
152 frequencies consistent with correct assembly for five of six markers (Supplemental Fig. S2). Only  
153 *ZNF326* was adjacent to a region with intrachromosomal contact dropout that could have resulted from  
154 misassembly. All snake microchromosome markers mapped to a single 139Mb scaffold, which was later  
155 broken into 10 microchromosome scaffolds (scaffold-mi1-10; see below).

156 We identified a single 114Mb scaffold corresponding to the Z Chromosome, as 10 of 11 Z-linked markers  
157 mapped to this scaffold. To further vet this as the Z-linked region of the genome, we mapped reads from  
158 male and female *C. viridis* (Supplemental Table S9) to the genome using BWA (Li and Durbin 2009)  
159 using program defaults. Male and female resequencing libraries were prepared using an Illumina Nextera  
160 prep kit and sequenced on an Illumina HiSeq 2500 using 250bp paired-end reads. Adapters were trimmed  
161 and low-quality reads were filtered using Trimmomatic (Bolger et al. 2014). After mapping, we filtered  
162 reads with low mapping scores and quantified per-base read depths using SAMtools (Li et al. 2009). We  
163 then totaled read depths for consecutive 100 kb windows and normalized windowed totals for female and  
164 male by dividing the value for each window by the median autosomal 100 kb window value for each sex,

165 then determined the normalized ratio of female to male coverage by calculating  $\log_2$ (female normalized  
166 coverage/male normalized coverage) per window. Here, the expectation is that a hemizygous locus will  
167 show roughly half the normalized coverage, which we observe for females over the majority of the Z  
168 Chromosome scaffold length, and not elsewhere in the genome. To demonstrate Z Chromosome  
169 conservation among pit vipers and to further determine the identity of this scaffold, we mapped male and  
170 female Pygmy Rattlesnake (*Sistrurus catenatus*) reads from Vicoso et al. (2013) and female and male  
171 Five Pace Viper (*Deinagkistrodon acutus*) reads from Yin et al. (2016) to the genome using the same  
172 parameters detailed above (Supplemental Fig. S7). *Anolis* Chromosome 6 is homologous with snake sex  
173 chromosomes (Srikulnath et al. 2009), thus we aligned *Anolis* Chromosome 6 (Alfoldi et al. 2011) to the  
174 Prairie Rattlesnake genome using a chromosome painting technique described below. As expected, we  
175 found a large quantity of high-similarity hits to the rattlesnake Z Chromosome scaffold, specifically,  
176 which were organized in a sequential manner across the Z scaffold (Fig. 1B).

177 We used multiple sources of information to identify the best candidate breakpoints between  
178 microchromosomes within the 139Mb fused microchromosome scaffold in the initial Hi-C assembly.  
179 First, because Chicago scaffolds must be assembled from fragments that are physically linked (Rice et al.  
180 2017), we used breakpoints between adjacent Chicago scaffolds on the microchromosome scaffold as  
181 candidate misjoins between microchromosomes, which identified 305 candidate break points. Second,  
182 intrachromosomal contact frequencies have been shown to be exponentially higher than contacts between  
183 chromosomes (Lieberman-Aiden et al. 2009), and we used shifts in intrachromosomal Hi-C data to  
184 further identify the nine most biologically plausible candidate break points among microchromosomes  
185 (Supplemental Fig. S16). Here, we stress two things relevant to using Hi-C contact data for this purpose:  
186 1) intrachromosomal contacts within candidate microchromosomes were far more frequent than contacts  
187 between candidate microchromosomes, as expected (Supplemental Fig. S16), and 2) the nine Hi-C  
188 derived breakpoints overlapped consistently with breaks between Chicago scaffolds. Because reptile  
189 microchromosomes are highly syntenic (Alfoldi et al. 2011), we also aligned the microchromosome  
190 scaffold to microchromosome scaffolds from chicken (Hillier et al. 2004) and *Anolis* using LASTZ  
191 (Harris 2007) to determine if likely chromosomal breakpoints also had shifts in synteny. To retain only  
192 highly similar alignments per comparison, we set the ‘hspthresh’ option equal to 10,000 (default is 3,000).  
193 We also set a step size equal to 20 to reduce computational time per comparison. We further validated  
194 candidate break points using genomic features that consistently vary at the ends of chromosomes. Here,  
195 we specifically evaluated if candidate breakpoints exhibited regional shifts in GC content and repeat  
196 content, similar to the ends of macrochromosomes (Fig. 1). Finally, if no annotated genes spanned this  
197 junction, we considered it biologically plausible. There were nine candidate breakpoints that met each of

198 these criteria, equaling the number of boundaries expected given ten microchromosomes (Supplemental  
199 Fig. S16).

200 To explore broad-scale structural evolution across reptiles, we used the rattlesnake genome to perform in  
201 silico painting of the chicken (*Gallus gallus* version 5) and green anole *Anolis carolinensis* (version 2)  
202 genomes. Briefly, we divided the rattlesnake genome into 2.02 million potential 100 bp markers. For each  
203 of these markers, we used BLAST to record the single best hit in the target genome requiring an  
204 alignment length of at least 50 bp. This resulted in 41,644 potential markers in *Gallus* and 103,801  
205 potential markers in *Anolis*. We then processed markers on each chromosome by requiring at least five  
206 consecutive markers supporting homology to the same rattlesnake chromosome. We consolidated each  
207 group of five consecutive potential markers as one confirmed marker. In *Gallus*, we rejected 12.4% of  
208 potential markers and identified 7,291 confirmed merged markers. In *Anolis*, we rejected 39.7% of  
209 potential markers and identified 12,511 confirmed merged markers.

210 This approach demonstrates considerable stability at the chromosomal level despite 158 million years of  
211 divergence between *Anolis* and *Crotalus* (Fig. 1B, Supplemental Fig. S5), and between squamates and  
212 birds, despite 280 million years of divergence between *Gallus* and *Crotalus* (and between *Gallus* and  
213 *Anolis*). This stability is evident not only in the macrochromosomes but also in the microchromosomes. In  
214 fact, 7 of 10 *Crotalus* microchromosomes had greater than 80% of confirmed markers associated with a  
215 single chromosome in the chicken genome (Fig. 1B, microchromosome inset). Comparisons among the  
216 three genomes suggest that the *Crotalus* genome has not experienced some of the fusions found in *Anolis*.  
217 Specifically, we infer that *Anolis* Chromosome 3 is a fusion of *Crotalus* Chromosomes 4 and 5. Likewise,  
218 *Anolis* Chromosome 4 is a fusion of *Crotalus* Chromosome 6 and 7. Divergence time estimates discussed  
219 above and shown in Fig. 1B were taken from the median of estimates for divergence between *Crotalus*  
220 and *Gallus* and between *Crotalus* and *Anolis* from Timetree ([www.timetree.org](http://www.timetree.org); Kumar et al. 2017).

221 To validate the genome-wide *k*-mer based approach used to identify homology among reptile  
222 chromosomes, we also performed a more traditional analysis using only protein-coding genes. We first  
223 identified 2,190 three-way reciprocal best BLAST hits among rattlesnake, anolis, and chicken protein-  
224 coding genes that we used as markers. Both the chicken and *Anolis* genomes contain genes that have not  
225 been placed on chromosomes and remain in unmapped scaffold or contigs, which reduced the number of  
226 markers available to 2,105 in chicken and 2,135 in *Anolis*. Results from this approach indicate that the *k*-  
227 mer approach is consistent with this more traditional approach but provides approximately three times the  
228 density of markers (Fig. 1B, Supplemental Fig. S5).



## 229 Genomic Patterns of GC Content

230 We quantified GC content in sliding windows of 100 kb and 1Mb across the genome using a custom  
231 Python script ([https://github.com/drewschiold/Comparative-Genomics-  
232 Tools/blob/master/slidingwindow\\_gc\\_content.py](https://github.com/drewschiold/Comparative-Genomics-Tools/blob/master/slidingwindow_gc_content.py)). GC content in 100 kb windows is presented in Fig. 1  
233 in the Main Text.

234 To determine if there is regional variation in nucleotide composition consistent with isochore structures  
235 across the rattlesnake genome, we quantified GC content and its variance within 5, 10, 20, 40, 80, 160,  
236 240, and 320 kb windows. The variation (standard deviation) in GC content is expected to decrease by  
237 half as window size increases four-fold if the genome is homogeneous (i.e., lacks isochore structures;  
238 (Venter et al. 2001). By comparing the observed variances of GC content across spatial window scales to  
239 those from 11 other squamate genomes, including lizards (*Anolis* has been shown to lack isochore  
240 structure (Alfoldi et al. 2011), henophidian snakes, and colubroid snakes, we were able to determine the  
241 relative heterogeneity of nucleotide composition in the rattlesnake (Supplemental Table S8). To reduce  
242 potential biases from estimates from small scaffold sizes, we filtered to only retain scaffolds greater than  
243 the size of the window analyzed (e.g., only scaffolds longer than 10 kb when looking at the standard  
244 deviation in GC content over 10 kb windows) and for which there was less than 20% of missing data.

245 To study patterns of molecular evolution across squamate evolution, we generated whole genome  
246 alignments of 12 squamates including the Green Anole (*Anolis carolinensis* v. anoCar2.0; Alfoldi et al.  
247 2011), Australian Bearded Dragon (*Pogona vitticeps* v. pvi1.1; Georges et al. 2015), Crocodile Lizard  
248 (*Shinisaurus crocodilurus* GigaDb version; Gao et al. 2017), Glass Lizard (*Ophisaurus gracilis* v.  
249 *O.gracilis.final*; Song et al. 2015), Schlegel's Japanese Gecko (*Gekko japonicus* v. 1.1 ; Liu et al. 2015),  
250 Leopard Gecko (*Eublepharis macularius* v. 1.0; Xiong et al. 2016), Prairie Rattlesnake (*Crotalus viridis*  
251 v. CroVir3.0; current study), Five-pacer Viper (*Deinagkistrodon acutus* GigaDb version; Yin et al. 2016),  
252 Burmese Python (*Python bivittatus* v. Python\_molurus\_bivittatus-5.0.2; Castoe et al. 2013), Boa  
253 Constrictor (*Boa constrictor* v. 7C; Bradnam et al. 2013), Garter Snake (*Thamnophis sirtalis* NCBI  
254 version; Perry et al. 2018), and King Cobra (*Ophiophagus Hannah* v. OphHan1.0; Vonk et al. 2013). We  
255 obtained the repeat libraries for each species and softmasked each assembly. The repeat library was not  
256 available for *Deinagkistrodon*, so we annotated repeats in that assembly using RepeatMasker v4.0.5 (Smit  
257 et al. 2015) with the vertebrate library from RepBase (Jurka et al. 2005). First, we generated pairwise  
258 syntenic alignments of each species as a query to the green anole genome (anoCar2.0) as a target using  
259 LASTZ v1.02 (Harris 2007) with the HoxD55 scoring matrix, followed by chaining to form gapless  
260 blocks and netting to rank the highest scoring chains (Kent et al. 2003) . The pairwise alignments were

261 used to construct a multiple sequence alignment with MULTIZ v11.2 (Blanchette et al. 2004) with Green  
262 Anole as the reference species. We then filtered the multi-species whole genome alignment to retain only  
263 blocks for which information for all 12 species was available, and concatenated blocks according to their  
264 organization in the anole lizard genome. We then calculated GC content within consecutive 50 kb  
265 windows of this concatenated alignment using the ‘slidingwindow\_gc\_content.py’ script detailed above.

## 266 **Comparative Microchromosome Genomics**

267 To understand evolutionary shifts in microchromosome composition among amniotes, we compared  
268 measures of gene density, GC content, and repeat content of macro- and microchromosomes between the  
269 rattlesnake, anole (Alfoldi et al. 2011), bearded dragon (Georges et al. 2015; Deakin et al. 2016), chicken  
270 (Hillier et al. 2004), and zebra finch (Warren et al. 2010) genomes. These species were chosen because  
271 their scaffolds are ordered into chromosomes and because their karyotypes contain microchromosomes.  
272 For each species, we downloaded relevant data from Ensembl and quantified the total number of genes  
273 per chromosome, total number of G+C bases, and total bases masked as repeats in RepeatMasker. We  
274 then normalized each measure by the total length of macrochromosome and microchromosome sequences  
275 in each genome, then calculated the ratio of microchromosome:macrochromosome proportions. We then  
276 used Fisher’s exact tests determine if one chromosome set possessed a significantly greater proportion of  
277 each measure. We generated a phylogenetic tree (Supplemental Fig. S4) for the five species based on  
278 divergence time estimates from TimeTree (Kumar et al. 2017), and plotted the ratio values calculated  
279 above onto the tree tips for between-species comparisons.

## 280 **Hi-C analysis**

281 Raw Illumina paired-end reads were mapped and processed using the Juicer pipeline (Durand et al. 2016)  
282 to produce Hi-C maps binned at multiple resolutions, as low as 5 kb resolution, and for the annotation of  
283 contact domains. These data were aligned against the CroVir3.0 assembly. All contact matrices used for  
284 further analysis were KR-normalized in Juicer. TAD domains were called using Juicer’s Arrowhead  
285 algorithm for finding contact domains at various resolutions (5 kb, 10 kb, 25 kb, 50 kb and 100 kb) using  
286 the default settings (Durand et al. 2016). 175 TADs were identified at 5 kb resolution, 16 at 10 kb, 53 at  
287 25 kb, 175 at 50 kb, and 126 at 100 kb. Additionally, TADs were annotated at 20kb resolution using the  
288 HiCEXplorer software (Ramírez et al. 2018). Raw reads were mapped and processed separately through  
289 HiCEXplorer and 1,262 TADs were called at 20 kb resolution using the default settings with the p-value  
290 set to 0.05. We further identified TADs by eye at finer scale (i.e., 5 kb) resolution.

291 We compared intra and interchromosomal contact frequencies between the rattlesnake venom gland and  
292 various tissues from mammals. To do this we quantified the total intra- and interchromosomal contacts  
293 between chromosome positions from the rattlesnake and the following Hi-C datasets: human  
294 lymphoblastoma cells (Rao et al. 2014) and human retinal epithelial cells, mouse kidney, and rhesus  
295 macaque tissue (Darrow et al. 2016). To investigate patterns of intra- and interchromosome contact  
296 frequency, we normalized contact frequencies by chromosome length. In the case of the mouse, we  
297 removed the Y chromosome due to its small size and relative lack of interchromosomal contacts. We then  
298 performed linear regressions of chromosome length and normalized intra- and interchromosomal contact  
299 frequencies (i.e., contact frequency/chromosome length). In all cases we observed a positive relationship  
300 between normalized intrachromosomal contacts and chromosome size and a negative relationship  
301 between normalized interchromosomal contacts and chromosome size (Fig. 3B). We also tested for  
302 significant differences in intra- and interchromosomal contact between the rattlesnake and mammals  
303 using *t*-tests.

### 304 **Sex Chromosome Analysis**

305 We identified the Prairie Rattlesnake Z Chromosome using methods described in the ‘Chromosome  
306 Identification and Synteny Analyses’ section above. We localized the candidate pseudoautosomal region  
307 (PAR) based on normalized female/male coverage (Fig. 2A; the PAR is the only region of the Z  
308 consistent with equal female and male coverage. We quantified gene content, GC content, and repeat  
309 content across the Z Chromosome and PAR (Supplemental Figs. S8, S9, and S10), and tested for gene  
310 enrichment in the PAR using a Fisher’s exact test, where we compared the number of genes within each  
311 region to the total length of the region.

312 To compare nucleotide diversity ( $\pi$ ) across the genome between male and female *C. viridis*, we called  
313 variants (i.e., heterozygous sites) from the male and female reads used in coverage analysis detailed  
314 above. With the mappings from coverage analysis, we used SAMtools (Li et al. 2009) to compile all  
315 mappings into pileup format, from which we called variant sites using BCFtools. We filtered sites to  
316 retain only biallelic variants using VCFtools (Danecek et al. 2011) and calculated the proportion of  
317 heterozygous sites using a custom pipeline of scripts. First, calcHet  
318 (<https://github.com/darencard/RADpipe>) outputs details of heterozygous site and  
319 window\_heterozygosity.py ([https://github.com/drewschield/Comparative-Genomics-](https://github.com/drewschield/Comparative-Genomics-Tools/blob/master/window_heterozygosity.py)  
320 [Tools/blob/master/window\\_heterozygosity.py](https://github.com/drewschield/Comparative-Genomics-Tools/blob/master/window_heterozygosity.py)) uses this output in conjunction with a windowed bed file  
321 generated using BEDtools ‘make\_windows’ tool to calculate  $\pi$  within a given window size. We then

322 normalized  $\pi$  for each genomic window in the female and male by the median value of  $\pi$  for female and  
 323 male autosomes, respectively.

324 Evolutionary patterns of the Z Chromosome were also analyzed by examining transposable element age  
 325 and composition along the whole chromosome, and between the PAR and the Z, specifically (see Main  
 326 Text). Since the length of the PAR is significantly smaller than the length of the Z, to rule out potential  
 327 biases due to unequal sample size we also independently analyzed fragments of the Z with lengths equal  
 328 to the PAR (total of 15 7.18 Mbp fragments). Each region was analyzed in RepeatMasker using a single  
 329 reference library that included the squamate fraction of the RepBase Tetrapoda library, and the snake  
 330 specific library clustered at a threshold of 0.75. The age distribution of TE families was estimated by  
 331 mean of the Kimura 2-parameter distance from the consensus sequence per element (CpG corrected)  
 332 calculated from PostProcessed.align outputs (see ‘Repeat Analysis’ section above), and using a modified  
 333 Perl script from Kapusta et al. (2017). We then merged estimates of repeat content from each of these  
 334 regions for comparison to the PAR region, specifically.

335 To quantify gene expression on the rattlesnake Z Chromosome and across the genome, we prepared  
 336 RNA-seq libraries from liver and kidney tissue from two males and females and sequenced them on an  
 337 Illumina HiSeq using 100bp paired-end reads (Supplemental Table S9). Samples and libraries were  
 338 prepared following the previously described methods of (Andrew et al. 2017). After filtering and adapter  
 339 trimming using Trimmomatic v. 0.32 (Bolger et al. 2014), we mapped RNA-seq reads to the *C. viridis*  
 340 genome using STAR v. 2.5.2b (Dobin et al. 2013) and counts were determined using featureCounts (Liao  
 341 et al. 2013). To be comparable to anole and chicken RNA-seq data described below, we analyzed the  
 342 rattlesnake RNA-seq reads as single-end data by ignoring the second read of each read pair. We  
 343 normalized read counts across tissues and samples using TMM normalization in edgeR (Robinson and  
 344 Oshlack 2010) to generate both counts per million (CPM) for use in pairwise comparisons between males  
 345 and females, and reads per kilobase million (RPKM) normalized counts for comparisons of chromosome-  
 346 wide expression within samples. All subsequent analyses of gene expression included only genes with  
 347 expression information in both the male and female (>1 average RPKM in each sex; average overall for  
 348 female and male were roughly equal). Mann-Whitney *U* tests in R (R Core Team 2017) were used to  
 349 compare median expression level between chromosomes and/or chromosomal regions (i.e., the PAR)  
 350 within males and females. Per gene female-to-male ratios of expression in the Z Chromosome were  
 351 normalized by taking the  $\log_2$  of the female and male Z expression values scaled to the median expression  
 352 level of autosomal genes in female and male, respectively:

$$353 \quad \text{Current female/male } Z = \log_2 \left[ \left( \frac{\text{female } Z}{\text{median female Auto}} \right) / \left( \frac{\text{male } Z}{\text{median male Auto}} \right) \right]$$

354 To explore regional variation in the current female-to-male (F/M) gene expression ratio across the Z  
 355 Chromosome, we performed a sliding window analysis of the  $\log_2$  F/M expression ratio with a window  
 356 size of 30 genes and a step size of 1 gene.

357 To further investigate patterns of gene expression in females and males across the Z Chromosome, we  
 358 compared current levels of female and male expression for Z-linked genes to inferred ancestral levels of  
 359 expression using autosomal 1:1 orthologs in the anole lizard and the chicken. Comparisons of sex  
 360 chromosome-linked genes to autosomal orthologs in outgroup species have been shown to provide robust  
 361 information about global ancestral expression patterns in the ‘proto-sex’ chromosomes of the focal  
 362 species (Julien et al. 2012; Marin et al. 2017), and can be used to determine if patterns of gene expression  
 363 between sexes are consistent with each other and with the evolution of dosage compensation mechanisms.  
 364 We first filtered to retain only the 1,343 non-PAR genes on the rattlesnake Z Chromosome for  
 365 comparison, and used reciprocal best BLAST searches to find putative 1:1 orthologs in the Ensembl anole  
 366 (version 2) and chicken (version 5) cDNA datasets, respectively. This resulted in 682 1:1 orthologs  
 367 between the rattlesnake and the anole, and 291 between the rattlesnake and the chicken, and 260 shared  
 368 orthologs among the three species (i.e., ‘proto-Z’ genes). All putative orthologs are located on autosomes  
 369 in both the anole and chicken. We also identified 3,059 1:1 orthologs that are autosomal in all three  
 370 species (i.e., ‘proto-autosomal’ genes). We then obtained RNA-seq data from Marin et al. (2017) for  
 371 female and male kidney and liver tissue for the chicken and anole (at least two replicates per tissue per  
 372 sex) and performed filtering, mapping, and normalization of counts using the methods described above  
 373 for the rattlesnake.

374 We used female and male expression levels from rattlesnake Z autosomal orthologs in the anole and  
 375 chicken to infer ancestral (i.e., proto-Z) female and male expression levels. To do this, we first calculated  
 376 the average expression value per proto-autosomal gene between the anole and chicken for each sex, and  
 377 then calculated the median expression value from each of these distributions. We used these median  
 378 values to normalize female and male expression in the anole and chicken 1:1 rattlesnake Z orthologs  
 379 (proto-Z genes) to a common scale (these values are analogous to the median female or male autosomal  
 380 denominators in the equations above for current female/male expression).

$$381 \quad \text{Proto-Z female} = \frac{\text{female proto-Z gene}}{\text{median female proto-autosomal}}$$

$$382 \quad \text{Proto-Z male} = \frac{\text{male proto-Z gene}}{\text{median male proto-autosomal}}$$

383 We then calculated a weighted average of female and male proto-Z expression per gene between the anole  
 384 and chicken designed to account for the more recent divergence between the anole and rattlesnake, which  
 385 was equal to the reciprocal of the sum of branch lengths based on the divergence times in millions of  
 386 years between rattlesnake and anole and between rattlesnake and chicken:

$$387 \quad \text{Branch length weight} = \frac{\text{branch length (rattlesnake to anole)}=158}{\text{branch length (rattlesnake to chicken)}=402} = 0.393$$

$$388 \quad \text{Weighted Proto-Z female} = \log_2 \left[ \frac{[(\text{Proto-Z female anole} * 1) + (\text{Proto-Z female chicken} * 0.393)]}{1.393} \right]$$

$$389 \quad \text{Weighted Proto-Z male} = \log_2 \left[ \frac{[(\text{Proto-Z male anole} * 1) + (\text{Proto-Z male chicken} * 0.393)]}{1.393} \right]$$

390 To further compare current and ancestral Z expression to the female and male distributions of proto-  
 391 autosomal expression, we calculated the average expression between the anole and chicken per proto-  
 392 autosomal gene, then normalized the averaged expression by the median of proto-autosomal expression  
 393 detailed above:

$$394 \quad \text{Proto-autosomal female} = \log_2 \left[ \frac{\text{female proto-autosomal gene}}{\text{median female proto-autosomal}} \right]$$

$$395 \quad \text{Proto-autosomal male} = \log_2 \left[ \frac{\text{male proto-autosomal gene}}{\text{median female proto-autosomal}} \right]$$

396 We also calculated the distribution of current autosomal expression in the rattlesnake by normalizing the  
 397 current female and male expression of rattlesnake autosomal genes by the median of female and male  
 398 expression of all autosomal genes, respectively:

$$399 \quad \text{Current autosomal female} = \log_2 \left[ \frac{\text{female autosomal gene}}{\text{median female autosomal}} \right]$$

$$400 \quad \text{Current autosomal male} = \log_2 \left[ \frac{\text{male autosomal gene}}{\text{median female autosomal}} \right]$$

401 We tested for enrichment of male and female-biased gene expression on chromosomes by first  
 402 characterizing genes as male or female biased if their current  $\log_2(\text{female/male})$  expression ratio was less  
 403 than -0.5 or greater than 0.5, respectively. We then compared proportions of male-biased, female-biased,  
 404 and unbiased between the Z Chromosome and autosomes using Fisher's exact tests to determine if the Z  
 405 Chromosome is enriched or depleted for sex-biased gene expression.

406 A potential mechanism for upregulation of Z-linked genes in females is positive regulation through  
407 estrogen response elements (EREs), which can enable binding of enhancers and promote transcription of  
408 genes over long distances (Lin et al. 2007). Rice et al. (2017) identified that the binding domain of *ESR1*  
409 is completely conserved among humans, chickens, and alligators, thus we obtained a position weight  
410 matrix for the *ESR1* binding motif (ERE) of humans (Lin et al. 2007) from the CisBP database, and  
411 performed binding site prediction using PoSSuM Search (Beckstette et al. 2006). For more details on  
412 PoSSuM Search parameters, see the ‘Transcription Factor Binding Site Prediction’ section below. We  
413 quantified the number of predicted EREs and the average current female/male gene expression ratio (see  
414 above) along the Z Chromosome in 100 kb windows, and tested for a relationship between these variables  
415 using a Pearson’s correlation coefficient in R.

416 We also quantified the number of predicted EREs in the entire genome, as well as the entire *Anolis*  
417 genome. We then compared the density of EREs (i.e., number of EREs divided by total scaffold length)  
418 between the rattlesnake *Anolis* genomes, and between the rattlesnake Z Chromosome and *Anolis*  
419 Chromosome 6, specifically. We tested for ERE enrichment on the Z Chromosome compared to *Anolis* 6  
420 using a Fisher’s exact test in R. To test more broadly for an expansion of EREs in snakes, we repeated  
421 this analysis using Z-linked and autosomal scaffolds from the five pace viper (*Deinagkistron acutus*; Yin  
422 et al. 2016).

### 423 **Transcription Factor Binding Site Prediction**

424 To identify putative transcription factor binding sites throughout the rattlesnake genome, we obtained the  
425 TRANSFAC position weight matrix (PSSM) for transcription factors of interest from the CIS-BP  
426 database (Weirauch et al. 2014). The focal transcription factors (e.g., *CTCF*, *NFI*, *GRHL1*, *ESR1*, and the  
427 remaining transcription factors on Supplemental Table S12) have conserved DNA binding domains  
428 among vertebrates, and where possible we obtained the chicken binding PSSM. In some cases there was  
429 no curated PSSM for chicken, and we used the PSSMs for human, and in the case of *NCOA2*  
430 (Supplemental Table S12), there was no available PSSM for a close relative. We searched for putative  
431 binding sites throughout the genome using PoSSuM Search (Beckstette et al. 2006). Because each PSSM  
432 has a different probability distribution based on the relative frequencies of observed binding and the  
433 length of the element, we pre-calculated the complete probability distribution for each PSSM using  
434 PoSSuMdist. We then used the resulting distribution in conjunction with relative base frequencies for the  
435 genome calculated using PoSSuMfreqs to identify putative binding sites exceeding a significance  
436 threshold. This threshold necessarily varied for different PSSMs, but was never higher than  $p < 1 \times 10^{-5}$ .

437 **Venom Gene Annotation and Analysis**

438 We took a multi-step approach toward identifying venom gene homologs in the rattlesnake genome. We  
439 first obtained representative gene sequences for 38 venom gene families from GenBank (Supplemental  
440 Table S10), comprising known enzymatic and toxin components of snake venoms. We then searched our  
441 transcript set using the venom gene family query set using a tBLASTx search, defining a similarity cutoff  
442 e-value of  $1 \times 10^{-5}$ . For each candidate venom gene transcript identified in this way, we then performed a  
443 secondary tBLASTx search against the NCBI database to confirm its identity as a venom gene. In the case  
444 of several venom gene families, such as those known only from elapid snake venom, we did not find any  
445 candidate genes. Three venom gene families that are especially abundant, both in terms of presence in the  
446 venom proteome (Fig. 4a) and in copy number, in the venom of *C. viridis* are phospholipases A2  
447 (*PLA2s*), snake venom metalloproteinases (*SVMPs*), and snake venom serine proteases (*SVSPs*).  
448 Rattlesnakes possess multiple members of each of these gene families (Mackessy 2008; Casewell et al.  
449 2011; Dowell et al. 2016), and the steps taken above appeared to underestimate the total number of copies  
450 in the *C. viridis* genome. Therefore, for each of these families, we performed an empirical annotation  
451 using the Fgenesh++ (Solovyev et al. 2006) protein similarity search. We first extracted the genomic  
452 region annotated for each of these families above plus and minus a 100 kb flanking region. We used  
453 protein sequences from Uniprot (*PLA2*: APD70899.1; *SVMP*: Q90282.1; and *SVSP*: F8S114.1) to query  
454 the region and confirm the total number of copies per family. Each gene annotated in this way was again  
455 searched against NCBI to confirm its identity and manual searches of aligned protein sequences (see  
456 phylogenetic analyses below) further confirmed their homology to each respective venom gene family.  
457 Genomic locations and details of annotated venom genes in the rattlesnake genome are provided in Table  
458 S9. We tested for venom gene enrichment on microchromosomes versus macrochromosomes using a  
459 Fisher's exact test, where numerator for each category was the number of venom genes located on each  
460 chromosome type, and the denominator in each category was the background number of genes, which  
461 allowed us to account for different levels of gene density on microchromosomes and macrochromosomes.

462 We used LASTZ (Harris 2007) to align the genomic regions containing *PLA2*, *SVMP*, and *SVSP* genes to  
463 themselves. We used program defaults, with the exception of the 'hspthresh' command, which we set to  
464 8,000. This was done to only return very high similarity matches between compared sequences. Here the  
465 expectation is that when alignments are plotted against one another, we will observe a diagonal line  
466 demonstrating perfect matches between each stretch of sequence and itself. In the case of segmental  
467 duplications, we also expect to see parallel and perpendicular (if in reverse orientation) segments adjacent  
468 to the diagonal 'self' axis. We plotted LASTZ results for each of the regions using the base plotting  
469 function in R (R Core Team 2017).



470 We then performed Bayesian phylogenetic analyses to further evaluate evidence of tandem duplication  
471 and monophyly among members of the *PLA2*, *SVMP*, and *SVSP* venom gene families. We generated  
472 protein alignments of venom genes with their closest homologs, which we identified using tBLASTx  
473 searches between venom genes and our whole gene set) using MUSCLE (Edgar 2004) with default  
474 parameters, with minor manual edits to the alignment to remove any poorly aligned regions. We analyzed  
475 the protein alignments using BEAST2 (Bouckaert et al. 2014), setting the site model to ‘WAG’ for each  
476 analysis. We ran each analysis for a minimum of  $1 \times 10^8$  generations, and evaluated whether runs had  
477 reached stationarity using Tracer (Drummond and Rambaut 2007). After discarding the first 10% of  
478 samples as burnin, we generated consensus maximum clade credibility trees using TreeAnnotator  
479 (distributed with BEAST2).

## 480 **Analyses of Venom Gland Gene Expression**

481 To explore venom gland gene expression in comparison to other body tissues, raw Illumina RNA-seq  
482 reads from all tissues (Supplemental Table S3) were quality trimmed using Trimmomatic v. 0.36 (Bolger  
483 et al. 2014) with default settings. We used STAR (Dobin et al. 2013) to align reads to the genome. Raw  
484 expression counts were estimated by counting the number of reads that mapped uniquely to a particular  
485 annotated transcript using HTSeq-count (Anders et al. 2013). These raw counts were then normalized and  
486 filtered in edgeR using TMM normalization (Oshlack et al. 2010; Robinson et al. 2010), and all  
487 subsequent analyses were done using these normalized data. To test for significant expression differences  
488 between venom gland and body tissues, we performed pairwise comparisons between combined venom  
489 gland (i.e., 1 day venom gland, 3 day venom gland, and unextracted venom gland) and body (all other  
490 tissues, except for accessory venom gland) tissue sets using an exact test of the binomial distribution  
491 estimated in edgeR, integrating tagwise dispersion (Robinson and Oshlack 2010). Genes with differential  
492 expression at an FDR value  $\leq 0.05$  were considered significant. Heatmaps were generated in R using the  
493 heatmap function from the R Stats package (R Core Team 2017).

494 To identify candidate transcription factors regulating venom gene expression, we searched the genome  
495 annotation for all genes included on the UniProt (<http://www.uniprot.org>) reviewed human transcription  
496 factor database, by specifying species = ‘Homo sapiens’ and reviewed = ‘yes’ in the advanced search  
497 terms. Using this list, we parsed our significant venom gland expressed gene results detailed above for  
498 candidate venom gland transcription factors, which showed a pattern of overall low body-wide expression  
499 and statistically significant evidence of higher expression in the venom gland, specifically. We identified  
500 12 candidates using this approach, including four members of the *CTF/NFI* family of RNA polymerase II  
501 core promoter-binding transcription factors (*NF1A*, two isoforms of *NF1B*, and *NF1X*). *NFI* binding sites

502 have been identified upstream of venom genes in several venomous snake taxa, including viperids,  
 503 elapids, and colubrids (e.g., crotoamine/myotoxin in *Crotalus durissus* (Rádis-Baptista et al. 2003) and  
 504 three finger toxins in *Naja sputatrix* (Lachumanan et al. 1998) and *Boiga dendrophila* (Pawlak and Kini  
 505 2008). *NFI* family members were also found to be expressed in the venom glands of several species in a  
 506 previous study exploring putative venom gland transcription factors (Hargreaves et al. 2014), but  
 507 information about whether they showed venom gland-specific expression was not provided. This set also  
 508 included the grainyhead-like homolog 1 (*GRHL1*) transcription factor Other significantly up-regulated  
 509 transcription factors in the venom gland appear to be involved in the unfolded protein stress response of  
 510 the endoplasmic reticulum and in glandular epithelium development and maintenance (Fig. 4B;  
 511 Supplemental Table S12). We quantified the distance between predicted binding sites of all transcription  
 512 factors upregulated in the venom gland (Supplemental Table S12) from 1) venom genes and 2) non-  
 513 venom genes and compared these distance distributions using *t*-tests.

514 Because four transcription factors of the *NFI* family each showed evidence of venom gland-specificity,  
 515 we tested the hypothesis that their binding motifs are also upstream of venom genes by quantifying the  
 516 number of predicted *NFI* binding sites from PSSM analyses detailed above in the 1 kb upstream region of  
 517 each venom gene. We also searched for proximity of *GRHL1* binding sites to venom gene regions, as well  
 518 as all nonvenom genes, using BEDtools (Quinlan and Hall 2010) to calculate the number of predicted  
 519 binding sites within 100 kb, 50 kb, 10 kb, and 5 kb intervals up and downstream of each gene. Here, we  
 520 did not confine our search only to promoter regions. To test for enrichment of *NFI* binding sites in the  
 521 upstream regions of venom genes, we divided the number of predicted binding sites upstream of venom  
 522 genes by the total length of upstream regions and compared this value to the analogous proportion for  
 523 upstream regions of all nonvenom genes using a Fisher's exact test (Supplemental Table S13). We  
 524 performed a similar analysis for *GRHL1* at each interval size, again comparing the density of predicted  
 525 *GRHL1* binding sites within intervals of venom genes to nonvenom genes (Supplemental Table S13). We  
 526 also used the Bedtools 'closest' function (Quinlan and Hall 2010) to calculate the distribution of distances  
 527 between genes and predicted *GRHL1* binding sites.

## 528 **Supplementary References**

- 529 Alfoldi J, Di Palma F, Grabherr M, Williams C, Kong L, Mauceli E, Russell P, Lowe CB, Glor RE, Jaffe  
 530 JD et al. 2011. The genome of the green anole lizard and a comparative analysis with birds and  
 531 mammals. *Nature* **477**(7366): 587-591.
- 532 Anders S, McCarthy DJ, Chen Y, Okoniewski M, Smyth GK, Huber W, Robinson MD. 2013. Count-  
 533 based differential expression analysis of RNA sequencing data using R and Bioconductor. *Nat*  
 534 *Protoc* **8**(9): 1765.

- 535 Andrew AL, Perry BW, Card DC, Schield DR, Ruggiero RP, McGaugh SE, Choudhary A, Secor SM,  
536 Castoe TA. 2017. Growth and stress response mechanisms underlying post-feeding regenerative  
537 organ growth in the Burmese python. *BMC Genomics* **18**(1): 338.
- 538 Baker RJ, Bull JJ, Mengden GA. 1972. Karyotypic studies of 38 species of North-American snakes.  
539 *Copeia* (2): 257-&.
- 540 Bao W, Kojima KK, Kohany O. 2015. Repbase Update, a database of repetitive elements in eukaryotic  
541 genomes. *Mobile DNA* **6**(1): 11.
- 542 Beckstette M, Homann R, Giegerich R, Kurtz S. 2006. Fast index based algorithms and software for  
543 matching position specific scoring matrices. *BMC Bioinformatics* **7**(1): 389.
- 544 Blanchette M, Kent WJ, Riemer C, Elnitski L, Smit AFA, Roskin KM, Baertsch R, Rosenbloom K,  
545 Clawson H, Green ED. 2004. Aligning multiple genomic sequences with the threaded blockset  
546 aligner. *Genome Res* **14**(4): 708-715.
- 547 Boetzer M, Henkel CV, Jansen HJ, Butler D, Pirovano W. 2010. Scaffolding pre-assembled contigs using  
548 SSPACE. *Bioinformatics* **27**(4): 578-579.
- 549 Bolger AM, Lohse M, Usadel B. 2014. Trimmomatic: a flexible trimmer for Illumina sequence data.  
550 *Bioinformatics* **30**(15): 2114-2120.
- 551 Bouckaert R, Heled J, Kuhnert D, Vaughan T, Wu CH, Xie D, Suchard MA, Rambaut A, Drummond AJ.  
552 2014. BEAST 2: a software platform for Bayesian evolutionary analysis. *PLoS Comp Bio* **10**(4):  
553 e1003537.
- 554 Bradnam KR, Fass JN, Alexandrov A, Baranay P, Bechner M, Birol I, Boisvert S, Chapman JA, Chapuis  
555 G, Chikhi R et al. 2013. Assemblathon 2: evaluating de novo methods of genome assembly in  
556 three vertebrate species. *GigaScience* **2**(1): 10.
- 557 Bushnell B. 2014. BMAP: a fast, accurate, splice-aware aligner. Ernest Orlando Lawrence Berkeley  
558 National Laboratory, Berkeley, CA (US).
- 559 Cantarel BL, Korf I, Robb SMC, Parra G, Ross E, Moore B, Holt C, Alvarado AS, Yandell M. 2008.  
560 MAKER: An easy-to-use annotation pipeline designed for emerging model organism genomes.  
561 *Genome Res* **18**(1): 188-196.
- 562 Casewell NR, Wagstaff SC, Harrison RA, Renjifo C, Wüster W. 2011. Domain loss facilitates accelerated  
563 evolution and neofunctionalization of duplicate snake venom metalloproteinase toxin genes. *Mol*  
564 *Biol Evol* **28**(9): 2637-2649.
- 565 Castoe TA, de Koning APJ, Hall KT, Card DC, Schield DR, Fujita MK, Ruggiero RP, Degner JF, Daza  
566 JM, Gu WJ et al. 2013. The Burmese python genome reveals the molecular basis for extreme  
567 adaptation in snakes. *Proc Natl Acad Sci USA* **110**(51): 20645-20650.
- 568 Chapman JA, Ho I, Sunkara S, Luo S, Schroth GP, Rokhsar DS. 2011. Meraculous: de novo genome  
569 assembly with short paired-end reads. *PLoS One* **6**(8): e23501.
- 570 Danecek P, Auton A, Abecasis G, Albers CA, Banks E, DePristo MA, Handsaker RE, Lunter G, Marth  
571 GT, Sherry ST et al. 2011. The variant call format and VCFtools. *Bioinformatics* **27**(15): 2156-  
572 2158.
- 573 Darrow EM, Huntley MH, Dudchenko O, Stamenova EK, Durand NC, Sun Z, Huang S-C, Sanborn AL,  
574 Machol I, Shamim M. 2016. Deletion of DXZ4 on the human inactive X chromosome alters  
575 higher-order genome architecture. *Proc Natl Acad Sci USA*: E4504-E4512.
- 576 Deakin JE, Edwards MJ, Patel H, O'Meally D, Lian J, Stenhouse R, Ryan S, Livernois AM, Azad B,  
577 Holleley CE. 2016. Anchoring genome sequence to chromosomes of the central bearded dragon  
578 (*Pogona vitticeps*) enables reconstruction of ancestral squamate macrochromosomes and  
579 identifies sequence content of the Z chromosome. *BMC Genomics* **17**.
- 580 Dobin A, Davis CA, Schlesinger F, Drenkow J, Zaleski C, Jha S, Batut P, Chaisson M, Gingeras TR.  
581 2013. STAR: ultrafast universal RNA-seq aligner. *Bioinformatics* **29**(1): 15-21.
- 582 Dowell NL, Giorgianni MW, Kassner VA, Selegue JE, Sanchez EE, Carroll SB. 2016. The deep origin  
583 and recent loss of venom toxin genes in rattlesnakes. *Curr Biol* **26**(18): 2434-2445.
- 584 Drummond AJ, Rambaut A. 2007. BEAST: Bayesian evolutionary analysis by sampling trees. *BMC Evol*  
585 *Biol* **7**.

- 586 Durand NC, Shamim MS, Machol I, Rao SSP, Huntley MH, Lander ES, Aiden EL. 2016. Juicer provides  
587 a one-click system for analyzing loop-resolution Hi-C experiments. *Cell Syst* **3**(1): 95-98.
- 588 Edgar RC. 2004. MUSCLE: multiple sequence alignment with high accuracy and high throughput.  
589 *Nucleic Acids Res* **32**(5): 1792-1797.
- 590 Gao J, Li Q, Wang Z, Zhou Y, Martelli P, Li F, Xiong Z, Wang J, Yang H, Zhang G. 2017. Sequencing,  
591 de novo assembling, and annotating the genome of the endangered Chinese crocodile lizard  
592 *Shinisaurus crocodilurus*. *GigaScience* **6**(7): 1-6.
- 593 Georges A, Li Q, Lian J, O'Meally D, Deakin J, Wang Z, Zhang P, Fujita M, Patel HR, Holleley CE.  
594 2015. High-coverage sequencing and annotated assembly of the genome of the Australian dragon  
595 lizard *Pogona vitticeps*. *GigaScience* **4**(1): 45.
- 596 Grabherr MG, Haas BJ, Yassour M, Levin JZ, Thompson DA, Amit I, Adiconis X, Fan L, Raychowdhury  
597 R, Zeng Q. 2011. Full-length transcriptome assembly from RNA-Seq data without a reference  
598 genome. *Nat Biotechnol* **29**(7): 644.
- 599 Hargreaves AD, Swain MT, Hegarty MJ, Logan DW, Mulley JF. 2014. Genomic and transcriptomic  
600 insights into the regulation of snake venom production. *bioRxiv*: 008474.
- 601 Harris RS. 2007. *Improved pairwise alignment of genomic DNA*. The Pennsylvania State University.
- 602 Hillier LW, Miller W, Birney E, Warren W, Hardison RC, Ponting CP, Bork P, Burt DW, Groenen  
603 MAM, Delany ME. 2004. Sequence and comparative analysis of the chicken genome provide  
604 unique perspectives on vertebrate evolution. *Nature* **432**(7018): 695-716.
- 605 Jiao W, Garcia Accinelli G, Hartwig B, Kiefer C, Baker D, Severing E, Willing E, Piednoel M, Woetzel  
606 S, Madrid-Herrero E et al. 2017. Improving and correcting the contiguity of long-read genome  
607 assemblies of three plant species using optical mapping and chromosome conformation capture  
608 data. *Genome Res* **27**: 778-786.
- 609 Julien P, Brawand D, Soumillon M, Necsulea A, Liechti A, Schütz F, Daish T, Grützner F, Kaessmann H.  
610 2012. Mechanisms and evolutionary patterns of mammalian and avian dosage compensation.  
611 *PLoS Biol* **10**(5): e1001328.
- 612 Jurka J, Kapitonov VV, Pavlicek A, Klonowski P, Kohany O, Walichiewicz J. 2005. Repbase Update, a  
613 database of eukaryotic repetitive elements. *Cytogenet Genome Res* **110**(1-4): 462-467.
- 614 Kapusta A, Suh A, Feschotte C. 2017 Dynamics of genome size evolution in birds and mammals. *Proc*  
615 *Natl Acad Sci USA* **114**(8): 1460-1469.
- 616 Kent WJ, Baertsch R, Hinrichs A, Miller W, Haussler D. 2003. Evolution's cauldron: duplication,  
617 deletion, and rearrangement in the mouse and human genomes. *Proc Natl Acad Sci USA* **100**(20):  
618 11484-11489.
- 619 Kumar S, Stecher G, Suleski M, Hedges SB. 2017. TimeTree: a resource for timelines, timetrees, and  
620 divergence times. *Mol Biol Evol* **34**(7): 1812-1819.
- 621 Lachumanan R, Armugam A, Tan C-H. 1998. Structure and organization of the cardiotoxin genes in *Naja*  
622 *naja sputatrix*. *FEBS letters* **433**(1-2): 119-124.
- 623 Li H, Durbin R. 2009. Fast and accurate short read alignment with Burrows-Wheeler transform.  
624 *Bioinformatics* **25**(14): 1754-1760.
- 625 Li H, Handsaker B, Wysoker A, Fennell T, Ruan J, Homer N, Marth G, Abecasis G, Durbin R, Genome  
626 Project Data Processing S. 2009. The Sequence Alignment/Map format and SAMtools.  
627 *Bioinformatics* **25**(16): 2078-2079.
- 628 Li W, Godzik A. 2006. Cd-hit: a fast program for clustering and comparing large sets of protein or  
629 nucleotide sequences. *Bioinformatics* **22**(13): 1658-1659.
- 630 Liao Y, Smyth GK, Shi W. 2013. featureCounts: an efficient general purpose program for assigning  
631 sequence reads to genomic features. *Bioinformatics* **30**(7): 923-930.
- 632 Lieberman-Aiden E, van Berkum NL, Williams L, Imakaev M, Ragooczy T, Telling A, Amit I, Lajoie BR,  
633 Sabo PJ, Dorschner MO et al. 2009. Comprehensive mapping of long-range interactions reveals  
634 folding principles of the human genome. *Science* **326**(5950): 289-293.
- 635 Lin C-Y, Vega VB, Thomsen JS, Zhang T, Kong SL, Xie M, Chiu KP, Lipovich L, Barnett DH, Stossi F.  
636 2007. Whole-genome cartography of estrogen receptor  $\alpha$  binding sites. *PLoS Genet* **3**(6): e87.

- 637 Liu B, Shi Y, Yuan J, Hu X, Zhang H, Li N, Li Z, Chen Y, Mu D, Fan W. 2013. Estimation of genomic  
638 characteristics by analyzing k-mer frequency in *de novo* genome projects. *arXiv:13082012*.
- 639 Liu Y, Zhou Q, Wang Y, Luo L, Yang J, Yang L, Liu M, Li Y, Qian T, Zheng Y. 2015. *Gekko japonicus*  
640 genome reveals evolution of adhesive toe pads and tail regeneration. *Nat Commun* **6**: 10033.
- 641 Mackessy SP. 2008. Venom composition in rattlesnakes: trends and biological significance. In *The*  
642 *Biology of Rattlesnakes*, (ed. WK Hayes, KR Beaman, MD Cardwell, SP Bush). Loma Linda  
643 University Press, Loma Linda, CA.
- 644 Marçais G, Kingsford C. 2011. A fast, lock-free approach for efficient parallel counting of occurrences of  
645 k-mers. *Bioinformatics* **27**(6): 764-770.
- 646 Marin R, Cortez D, Lamanna F, Pradeepa MM, Leushkin E, Julien P, Liechti A, Halbert J, Brüning T,  
647 Mössinger K. 2017. Convergent origination of a *Drosophila*-like dosage compensation  
648 mechanism in a reptile lineage. *Genome Res* **27**(12): 1974-1987.
- 649 Matsubara K, Tarui H, Toriba M, Yamada K, Nishida-Umehara C, Agata K, Matsuda Y. 2006. Evidence  
650 for different origin of sex chromosomes in snakes, birds, and mammals and step-wise  
651 differentiation of snake sex chromosomes. *Proc Natl Acad Sci USA* **103**(48): 18190-18195.
- 652 Nadalin F, Vezzi F, Policriti A. 2012. GapFiller: a de novo assembly approach to fill the gap within  
653 paired reads. *BMC Bioinformatics* **13**(14): S8.
- 654 Oshlack A, Robinson MD, Young MD. 2010. From RNA-seq reads to differential expression results.  
655 *Genome Biol* **11**(12): 220.
- 656 Pawlak J, Kini RM. 2008. Unique gene organization of colubrid three-finger toxins: complete cDNA and  
657 gene sequences of denmotoxin, a bird-specific toxin from colubrid snake *Boiga dendrophila*  
658 (Mangrove Catsnake). *Biochimie* **90**(6): 868-877.
- 659 Perry BW, Card DC, McGlothlin JW, Pasquesi GI, Hales NR, Corbin AB, Adams RH, Schield DR, Fujita  
660 MK, Demuth JP et al. In Review. Molecular adaptations for sensing and securing prey, and  
661 insight into amniote genome diversity, revealed by the garter snake genome.
- 662 Platt RN, Blanco-Berdugo L, Ray DA. 2016. Accurate transposable element annotation is vital when  
663 analyzing new genome assemblies. *Genome Biol Evol* **8**(2): 403-410.
- 664 Putnam NH, O'Connell BL, Stites JC, Rice BJ, Blanchette M, Calef R, Troll CJ, Fields A, Hartley PD,  
665 Sugnet CW et al. 2016. Chromosome-scale shotgun assembly using an in vitro method for long-  
666 range linkage. *Genome Res* **26**: 1-9.
- 667 Quinlan AR, Hall IM. 2010. BEDTools: a flexible suite of utilities for comparing genomic features.  
668 *Bioinformatics* **26**(6): 841-842.
- 669 R Core Team. 2017. R: A language and environment for statistical computing.
- 670 Rádis-Baptista G, Kubo T, Oguiura N, Svartman M, Almeida TMB, Batistic RF, Oliveira EB, Vianna-  
671 Morgante ÂM, Yamane T. 2003. Structure and chromosomal localization of the gene for  
672 crotamine, a toxin from the South American rattlesnake, *Crotalus durissus terrificus*. *Toxicon*  
673 **42**(7): 747-752.
- 674 Ramírez F, Bhardwaj V, Arrigoni L, Lam KC, Grüning BA, Villaveces J, Habermann B, Akhtar A,  
675 Manke T. 2018. High-resolution TADs reveal DNA sequences underlying genome organization  
676 in flies. *Nat Commun* **9**(1): 189.
- 677 Rao SSP, Huntley MH, Durand NC, Stamenova EK, Bochkov ID, Robinson JT, Sanborn AL, Machol I,  
678 Omer AD, Lander ES. 2014. A 3D map of the human genome at kilobase resolution reveals  
679 principles of chromatin looping. *Cell* **159**(7): 1665-1680.
- 680 Reyes-Velasco J, Card DC, Andrew AL, Shaney KJ, Adams RH, Schield DR, Casewell NR, Mackessy  
681 SP, Castoe TA. 2015. Expression of venom gene homologs in diverse python tissues suggests a  
682 new model for the evolution of snake venom. *Mol Biol Evol* **32**(1): 173-183.
- 683 Rice ES, Kohno S, John JS, Pham S, Howard J, Lareau LF, O'Connell BL, Hickey G, Armstrong J, Deran  
684 A et al. 2017. Improved genome assembly of American alligator genome reveals conserved  
685 architecture of estrogen signaling. *Genome Res* **27**(5): 686-696.
- 686 Robinson MD, McCarthy DJ, Smyth GK. 2010. edgeR: a Bioconductor package for differential  
687 expression analysis of digital gene expression data. *Bioinformatics* **26**(1): 139-140.

- 688 Robinson MD, Oshlack A. 2010. A scaling normalization method for differential expression analysis of  
689 RNA-seq data. *Genome Biol* **11**(3): R25.
- 690 Simão FA, Waterhouse RM, Ioannidis P, Kriventseva EV, Zdobnov EM. 2015. BUSCO: assessing  
691 genome assembly and annotation completeness with single-copy orthologs. *Bioinformatics*  
692 **31**(19): 3210-3212.
- 693 Smit AFA, Hubley R. 2015. RepeatModeler Open 1.0.
- 694 Smit AFA, Hubley R, Green P. 2015. RepeatMasker Open-4.0. 2013–2015. *Institute for Systems Biology*  
695 <http://repeatmasker.org>.
- 696 Solovyev V, Kosarev P, Seledsov I, Vorobyev D. 2006. Automatic annotation of eukaryotic genes,  
697 pseudogenes and promoters. *Genome Biol* **7**(1): S10.
- 698 Song B, Cheng S, Sun Y, Zhong X, Jin J, Guan R, Murphy RW, Che J, Zhang Y, Liu X. 2015. A genome  
699 draft of the legless anguid lizard, *Ophisaurus gracilis*. *GigaScience* **4**(1): 17.
- 700 Srikulnath K, Nishida C, Matsubara K, Uno Y, Thongpan A, Suputtitada S, Apisitwanich S, Matsuda Y.  
701 2009. Karyotypic evolution in squamate reptiles: comparative gene mapping revealed highly  
702 conserved linkage homology between the butterfly lizard (*Leiolepis reevesii rubritaeniata*,  
703 Agamidae, Lacertilia) and the Japanese four-striped rat snake (*Elaphe quadrivirgata*, Colubridae,  
704 Serpentes). *Chromosome Res* **17**(8): 975-986.
- 705 Stanke M, Morgenstern B. 2005. AUGUSTUS: a web server for gene prediction in eukaryotes that allows  
706 user-defined constraints. *Nucleic Acids Res* **33**(suppl\_2): W465-W467.
- 707 UniProt C. 2017. UniProt: the universal protein knowledgebase. *Nucleic Acids Res* **45**(D1): D158-D169.
- 708 Vicoso B, Emerson JJ, Zektser Y, Mahajan S, Bachtrog D. 2013. Comparative sex chromosome genomics  
709 in snakes: differentiation, evolutionary strata, and lack of global dosage compensation. *PLoS Biol*  
710 **11**(8): e1001643.
- 711 Venter JC, Adams MD, Myers EW, Li PW, Mural RJ, Sutton GG, Smith HO, Yandell M, Evans MA,  
712 Holt RA et al. 2001. The sequence of the human genome. *Science* **291**: 1304-1351.
- 713 Vonk FJ, Casewell NR, Henkel CV, Heimberg AM, Jansen HJ, McCleary RJR, Kerckamp HME, Vos  
714 RA, Guerreiro I, Calvete JJ et al. 2013. The king cobra genome reveals dynamic gene evolution  
715 and adaptation in the snake venom system. *Proc Natl Acad Sci USA* **110**(51): 20651-20656.
- 716 Warren WC, Clayton DF, Ellegren H, Arnold AP, Hillier LW, Kunstner A, Searle S, White S, Vilella AJ,  
717 Fairley S et al. 2010. The genome of a songbird. *Nature* **464**(7289): 757-762.
- 718 Weirauch MT, Yang A, Albu M, Cote AG, Montenegro-Montero A, Drewe P, Najafabadi HS, Lambert  
719 SA, Mann I, Cook K. 2014. Determination and inference of eukaryotic transcription factor  
720 sequence specificity. *Cell* **158**(6): 1431-1443.
- 721 Xiong Z, Li F, Li Q, Zhou L, Gamble T, Zheng J, Kui L, Li C, Li S, Yang H. 2016. Draft genome of the  
722 leopard gecko, *Eublepharis macularius*. *GigaScience* **5**(1): 47.
- 723 Xue W, Li J-T, Zhu Y-P, Hou G-Y, Kong X-F, Kuang Y-Y, Sun X-W. 2013. L\_RNA\_scaffolder:  
724 scaffolding genomes with transcripts. *BMC genomics* **14**(1): 604.
- 725 Yin W, Wang ZJ, Li QY, Lian JM, Zhou Y, Lu BZ, Jin LJ, Qiu PX, Zhang P, Zhu WB et al. 2016.  
726 Evolutionary trajectories of snake genes and genomes revealed by comparative analyses of five-  
727 pacer viper. *Nat Commun* **7**: 13107.

728

729

730 **2. SUPPLEMENTAL TABLES**

731 **Supplemental Table S1.** Sequencing libraries used in the Prairie Rattlesnake genome assembly. Where  
 732 noted, various libraries were used in the previous assembly (CroVir2.0). Data from Chicago and Hi-C  
 733 libraries are available under NCBI BioProject accession PRJNA413201.

| <b>Library</b>                       | <b>Read Type</b> | <b>Number of Reads</b> | <b>Assembly Version</b> |
|--------------------------------------|------------------|------------------------|-------------------------|
| 50bp short read                      | single end       | 9,536,384              | CroVir2.0               |
| 100bp short read                     | paired end       | 449775645              | CroVir2.0, CroVir3.0    |
| 150bp short read                     | paired end       | 41,211,014             | CroVir2.0               |
| 150bp long insert mate pair (3-5 kb) | paired end       | 188,532,564            | CroVir2.0               |
| 150bp long insert mate pair (6-8 kb) | paired end       | 189,928,342            | CroVir2.0               |
| PacBio long reads                    | -                | 1,027,365              | CroVir2.0               |
| Chicago library 1 (150 bp)           | paired end       | 251,689,106            | CroVir3.0               |
| Chicago library 2 (150 bp)           | paired end       | 206,176,028            | CroVir3.0               |
| Hi-C library 1 (150 bp)              | paired end       | 230,083,402            | CroVir3.0               |
| Hi-C library 2 (150 bp)              | paired end       | 160,673,944            | CroVir3.0               |

734

735

736

737 **Supplemental Table S2.** Basic information about assembly versions for the Prairie Rattlesnake genome.

| <b>Assembly</b>            | <b>CroVir2.0</b> | <b>Chicago Assembly</b> | <b>Chicago + Hi-C Assembly</b> |
|----------------------------|------------------|-------------------------|--------------------------------|
| Longest Scaffold (bp)      | 1,184,546        | 11,576,738              | 311,712,589                    |
| Number of Scaffolds        | 47,782           | 8,183                   | 7,034                          |
| Number of Scaffolds > 1 kb | 47,658           | 8,059                   | 6,910                          |
| Contig N50 (kb)            | 15.81            | 14.91                   | 14.96                          |
| Scaffold N50 (kb)          | 139              | 2,472                   | 179,898                        |
| Number of Gaps             | 112,369          | 158,269                 | 159,024                        |
| Percent of Genome in Gaps  | 5.84%            | 6.15%                   | 6.16%                          |

738

739 **Supplemental Table S3.** RNA-seq libraries used for transcriptome assembly. Raw reads for each library  
 740 are available on the NCBI Short Read Archive, accession PRJNA477004.

| Sample ID | Tissue                | Raw Reads  | Quality Trimmed Reads |
|-----------|-----------------------|------------|-----------------------|
| CroVirPan | pancreas              | 28,126,703 | 27,073,946            |
| CroVirTon | tongue                | 24,451,116 | 23,561,349            |
| CroVirVG1 | venom gland           | 41,744,110 | 40,147,306            |
| CroVirVG3 | venom gland           | 29,216,664 | 28,035,353            |
| Cvv01     | liver                 | 7,833,506  | 7,365,740             |
| Cvv02     | liver                 | 7,451,792  | 7,064,234             |
| Cvv11     | liver                 | 9,218,939  | 8,441,587             |
| Cvv20     | kidney                | 6,958,120  | 6,580,387             |
| Cvv22     | kidney                | 8,116,679  | 7,601,517             |
| Cvv23     | kidney                | 7,193,762  | 6,785,947             |
| Cvv25     | skin                  | 7,849,895  | 7,303,441             |
| Cvv26     | pancreas              | 8,886,612  | 8,160,214             |
| Cvv27     | venom gland           | 3,098,151  | 2,928,974             |
| Cvv28     | lung                  | 6,613,196  | 6,024,613             |
| Cvv29     | testes                | 5,055,189  | 4,745,375             |
| Cvv30     | accessory venom gland | 3,261,326  | 3,053,142             |
| Cvv31     | shaker muscle         | 4,290,989  | 3,996,274             |
| Cvv32     | pancreas              | 4,836,715  | 4,566,165             |
| Cvv33     | brain                 | 3,815,570  | 3,569,113             |
| Cvv34     | stomach               | 5,297,110  | 4,993,142             |
| Cvv35     | ovaries               | 3,737,870  | 3,528,104             |
| Cvv36     | rictal gland          | 6,654,626  | 6,070,883             |
| Cvv37     | spleen                | 7,776,020  | 6,975,210             |
| Cvv38     | blood                 | 2,550,433  | 2,364,162             |

741

742 **Supplemental Table S4.** BUSCO results for assembly versions of the prairie rattlesnake genome.  
 743 Proportions of each category are in parentheses.

| BUSCO category           | CroVir2.0      | CroVir3.0 (current) |
|--------------------------|----------------|---------------------|
| Complete                 | 3,277 (83.0 %) | 3,372 (85.3 %)      |
| Complete and single-copy | 3,253 (82.4%)  | 3,347 (84.7%)       |
| Complete and duplicated  | 24 (0.6%)      | 25 (0.6%)           |
| Fragmented               | 364 (9.2%)     | 298 (7.5%)          |
| Missing                  | 309 (7.8%)     | 280 (7.2%)          |
| Total searched           | 3,950          | 3,950               |

744



745 **Supplemental Table S5.** Genome-wide annotated repeat proportions identified using RepeatMasker.

|                                   | # elements | length masked (bp) | % of sequence | % element masked |
|-----------------------------------|------------|--------------------|---------------|------------------|
| <b>Total masked</b>               | 2,966,274  | 489,373,735        | 38.91         | 100.00           |
| <b>Total interspersed repeats</b> | 2,348,232  | 463,237,605        | 36.83         | 79.16            |
| <b>Retroelements</b>              | 1,139,213  | 295,244,109        | 22.81         | 38.41            |
| <b>SINEs</b>                      | 173,332    | 22,894,322         | 1.82          | 5.84             |
| Squam1/Sauria                     | 19,230     | 3,376,458          | 0.27          | 0.65             |
| Other SINEs                       | 126,898    | 15,602,678         | 1.24          | 4.28             |
| <b>LINEs</b>                      | 621,859    | 170,275,973        | 13.54         | 20.96            |
| CR1-Like                          | 359,387    | 91,177,000         | 7.25          | 12.12            |
| CR1/L3                            | 288,888    | 74,285,822         | 5.91          | 9.74             |
| L2                                | 53,219     | 12,036,490         | 0.96          | 1.79             |
| Rex                               | 19,032     | 5,339,363          | 0.42          | 0.64             |
| R1/LOA/Jockey                     | 3,272      | 854,611            | 0.07          | 0.11             |
| R2/R4/NeSL                        | 35,256     | 9,045,775          | 0.72          | 1.19             |
| RTE/Bov-B                         | 101,958    | 32,795,496         | 2.61          | 3.44             |
| L1/CIN4                           | 78,926     | 28,358,227         | 2.25          | 2.66             |
| Other LINEs                       | 154,019    | 16,472,232         | 0.64          | 5.19             |
| <b>Other nonLTR</b>               | 10,119     | 1,572,442          | 0.13          | 0.34             |
| <b>DIRS</b>                       | 28,657     | 13,553,057         | 1.08          | 0.97             |
| <b>PLEs</b>                       | 120,162    | 19,278,497         | 1.53          | 4.05             |
| <b>LTR elements</b>               | 156,427    | 54,116,761         | 4.30          | 5.27             |
| BEL/Pao                           | 4,007      | 1,927,682          | 0.15          | 0.14             |
| Ty1/Copia                         | 9,160      | 3,340,874          | 0.27          | 0.31             |
| Gypsy                             | 77,793     | 35,080,772         | 2.79          | 2.62             |
| Retroviral                        | 16,727     | 5,393,228          | 0.43          | 0.56             |
| Other LTR                         | 48,740     | 8,374,205          | 0.67          | 1.64             |
| <b>DNA transposons</b>            | 850,487    | 125,287,793        | 9.96          | 28.67            |
| hobo-Activator                    | 428,247    | 60,243,144         | 4.79          | 14.44            |
| Tc1-IS630-Pogo                    | 283,367    | 48,888,185         | 3.89          | 9.55             |
| En-Spm                            | 12,485     | 1,964,905          | 0.16          | 0.42             |
| MuDR-IS905                        | 1,300      | 383,077            | 0.03          | 0.04             |
| PiggyBac                          | 131        | 22,504             | 0.00          | 0.00             |
| Tourist/Harbinger                 | 80,904     | 7,193,605          | 0.57          | 2.73             |
| P elements                        | 155        | 45,074             | 0.00          | 0.01             |
| Rolling-circles                   | 3,736      | 635,885            | 0.05          | 0.13             |
| SPIN                              | 253        | 26,640             | 0.00          | 0.01             |
| Other DNA                         | 39,909     | 5,884,774          | 0.47          | 1.35             |
| <b>Unclassified</b>               | 358,532    | 48,493,199         | 3.86          | 12.09            |
| <b>Total interspersed repeats</b> | 2,348,232  | 463,237,605        | 36.83         | 79.16            |
| Small RNA                         | 2,054      | 174,940            | 0.01          | 0.07             |
| Satellites                        | 4,952      | 1,104,344          | 0.09          | 0.17             |
| Simple repeats                    | 540,288    | 28,572,170         | 2.27          | 18.21            |
| Low complexity                    | 70,748     | 4,755,565          | 0.38          | 2.39             |

747  
748  
749  
750  
751  
752

**Supplemental Table S6.** Mapping of cDNA markers from Matsubara et al. 2006 to the Prairie Rattlesnake genome. Locations of best BLAST hits of each cDNA marker to the genome are reported. Markers that mapped with exceptional similarity to multiple locations in the genome are denoted with a '#', and markers that did not map to the chromosome as predicted by Matsubara et al. (2006) are denoted with a '\*'. Details for these markers are provided in Supplemental Table S7 and Supplemental Fig. S2.

| Marker            | Accession | Chromosome | Scaffold     | e-value   | bit-score | Start Position | End Position |
|-------------------|-----------|------------|--------------|-----------|-----------|----------------|--------------|
| <i>OMG</i>        | BW999947  | 1p         | scaffold-ma1 | 6.00E-115 | 398       | 309337082      | 309336564    |
| <i>XABI</i>       | AU312353  | 1p         | scaffold-ma1 | 2.00E-46  | 122       | 297437298      | 297437486    |
| <i>MGC15407</i>   | AU312344  | 1p         | scaffold-ma1 | 2.00E-65  | 92.3      | 288097081      | 288097206    |
| <i>XPO1</i>       | AU312325  | 1p         | scaffold-ma1 | 2.00E-113 | 153       | 289547707      | 289547901    |
| <i>DEGS</i>       | AU312341  | 1p         | scaffold-ma1 | 5.00E-106 | 356       | 269312409      | 269311948    |
| <i>KIAA0007</i>   | AU312332  | 1p         | scaffold-ma1 | 5.00E-50  | 120       | 265943692      | 265943841    |
| <i>EPRS</i>       | AU312324  | 1p         | scaffold-ma1 | 2.00E-91  | 174       | 270708945      | 270709160    |
| <i>ARID4B</i>     | AU312346  | 1p         | scaffold-ma1 | 1.00E-129 | 333       | 252059286      | 252059699    |
| <i>QKI</i>        | AU312356  | 1p         | scaffold-ma1 | 5.00E-112 | 124       | 246094729      | 246094887    |
| <i>MDN1</i>       | AU312339  | 1p         | scaffold-ma1 | 7.00E-60  | 109       | 211517498      | 211517349    |
| <i>AFTIPHILIN</i> | AU312311  | 1p         | scaffold-ma1 | 5.00E-75  | 112       | 170752748      | 170752888    |
| <i>SF3B1</i>      | AU312337  | 1q         | scaffold-ma1 | 7.00E-95  | 215       | 150078848      | 150078576    |
| <i>CACNB4</i>     | BW999948  | 1q         | scaffold-ma1 | 1.00E-47  | 102       | 127283965      | 127283819    |
| <i>ZFHX1B</i>     | BW999949  | 1q         | scaffold-ma1 | 6.00E-93  | 204       | 123301385      | 123301101    |
| <i>UMPS</i>       | AU312331  | 1q         | scaffold-ma1 | 8.00E-95  | 198       | 113761458      | 113761724    |
| <i>TCIRG1</i>     | BW999950  | 1q         | scaffold-ma1 | 2.00E-72  | 164       | 102088882      | 102089094    |
| <i>TSG101</i>     | AU312316  | 1q         | scaffold-ma1 | 4.00E-76  | 113       | 88358887       | 88359054     |
| <i>MIIS1</i>      | AU312350  | 1q         | scaffold-ma1 | 4.00E-31  | 94.5      | 70777673       | 70777560     |
| <i>GPHN</i>       | AU312327  | 1q         | scaffold-ma1 | 5.00E-68  | 116       | 60249829       | 60249644     |
| <i>DNCH1</i>      | AU312310  | 1q         | scaffold-ma1 | 1.00E-71  | 145       | 25060055       | 25059885     |
| <i>HSPCA</i>      | BW999951  | 1q         | scaffold-ma1 | 2.00E-123 | 149       | 25029984       | 25030184     |
| <i>ISYNA1</i>     | AU312338  | 1q         | scaffold-ma1 | 2.00E-89  | 178       | 7770987        | 7771196      |
| <i>TUBGCP2</i>    | AU312343  | 1q         | scaffold-ma1 | 4.00E-74  | 136       | 9697568        | 9697377      |
| <i>ZFR</i>        | AU312309  | 2p         | scaffold-ma2 | 8.00E-110 | 208       | 222653709      | 222653461    |
| <i>PHAX</i>       | AU312322  | 2p         | scaffold-ma2 | 3.00E-99  | 224       | 189308026      | 189307715    |
| <i>VPS13A</i>     | BW999952  | 2p         | scaffold-ma2 | 9.00E-70  | 109       | 179725513      | 179725656    |
| <i>UBQLN1</i>     | BW999953  | 2p         | scaffold-ma2 | 2.00E-87  | 132       | 182156077      | 182156238    |
| <i>C9orf72</i>    | AU312326  | 2p         | scaffold-ma2 | 5.00E-91  | 203       | 164760033      | 164760347    |
| <i>KIAA0368</i>   | BW999954  | 2p         | scaffold-ma2 | 1.00E-56  | 116       | 161287251      | 161287397    |
| <i>TOPORS</i>     | BW999955  | 2p         | scaffold-ma2 | 8.00E-118 | 410       | 162258381      | 162257809    |
| <i>FAM48A</i>     | BW999956  | 2cen       | scaffold-ma2 | 1.00E-45  | 102       | 157286823      | 157286680    |
| <i>UNQ501</i>     | AU312305  | 2cen       | scaffold-ma2 | 6.00E-118 | 284       | 142895238      | 142895636    |
| <i>DCTN2</i>      | AU312317  | 2q         | scaffold-ma2 | 4.00E-80  | 122       | 122527271      | 122527110    |
| <i>EXOC7</i>      | BW999957  | 2q         | scaffold-ma2 | 3.00E-93  | 121       | 92952368       | 92952526     |
| <i>DDX5</i>       | BW999958  | 2q         | scaffold-ma2 | 7.00E-112 | 144       | 108253948      | 108253775    |
| <i>CCNG1</i>      | AU312308  | 2q         | scaffold-ma2 | 6.00E-70  | 173       | 80553964       | 80553731     |

|                            |          |    |              |           |      |           |           |
|----------------------------|----------|----|--------------|-----------|------|-----------|-----------|
| <i>CPEB4</i>               | AU312333 | 2q | scaffold-ma2 | 3.00E-119 | 250  | 72297563  | 72297874  |
| <i>FLJ22318</i>            | AU312329 | 2q | scaffold-ma2 | 2.00E-105 | 194  | 51908839  | 51908582  |
| <i>DCTN4</i>               | AU312349 | 2q | scaffold-ma2 | 4.00E-50  | 99.6 | 58962806  | 58962928  |
| <i>C5orf14</i>             | AU312304 | 2q | scaffold-ma2 | 4.00E-120 | 329  | 64853582  | 64853127  |
| <i>NOSIP*</i>              | AU312303 | 2q | scaffold-Z   | 1.00E-51  | 93.6 | 92988551  | 92988661  |
| <i>RBM5<sup>#</sup></i>    | BW999960 | 2q | scaffold-mi8 | 6.00E-78  | 90.4 | 9620291   | 9620181   |
| <i>RBM5<sup>#</sup></i>    | BW999960 | 2q | scaffold-ma2 | 7.00E-13  | 76.1 | 130725514 | 130725606 |
| <i>ITPR1</i>               | BW999961 | 2q | scaffold-ma2 | 9.00E-53  | 135  | 23858424  | 23858585  |
| <i>ENPP2</i>               | BW999962 | 3p | scaffold-ma3 | 6.00E-90  | 121  | 9756367   | 9756209   |
| <i>YWHAZ</i>               | BW999963 | 3p | scaffold-ma3 | 2.00E-99  | 180  | 16759896  | 16760114  |
| <i>LRCC1</i>               | BW999964 | 3p | scaffold-ma3 | 4.00E-83  | 150  | 21993774  | 21993565  |
| <i>LYPLA1</i>              | BW999965 | 3p | scaffold-ma3 | 3.00E-107 | 149  | 31673258  | 31673440  |
| <i>SS18</i>                | AU312302 | 3p | scaffold-ma3 | 1.00E-83  | 126  | 36811554  | 36811724  |
| <i>MBP</i>                 | AU312318 | 3p | scaffold-ma3 | 7.00E-111 | 179  | 49049170  | 49049382  |
| <i>EPB41L3</i>             | BW999966 | 3p | scaffold-ma3 | 3.00E-84  | 141  | 40222999  | 40222808  |
| <i>TUBB2A</i>              | BW999967 | 3p | scaffold-ma3 | 8.00E-91  | 155  | 59187732  | 59187532  |
| <i>LRRC16</i>              | BW999968 | 3p | scaffold-ma3 | 2.00E-100 | 144  | 51025171  | 51025350  |
| <i>SERPIN6<sup>#</sup></i> | BW999969 | 3p | scaffold-ma5 | 5.00E-99  | 130  | 36540937  | 36540755  |
| <i>SERPIN6<sup>#</sup></i> | BW999969 | 3p | scaffold-ma3 | 2.00E-76  | 113  | 60484038  | 60483865  |
| <i>BPHL</i>                | BW999970 | 3p | scaffold-ma3 | 1.00E-87  | 118  | 59199779  | 59199621  |
| <i>KIF13A</i>              | BW999971 | 3p | scaffold-ma3 | 3.00E-78  | 139  | 53681516  | 53681349  |
| <i>TPR</i>                 | BW999972 | 3q | scaffold-ma3 | 6.00E-83  | 122  | 93408800  | 93408636  |
| <i>AKRIA1</i>              | BW999973 | 3q | scaffold-ma3 | 9.00E-75  | 153  | 133869419 | 133869619 |
| <i>ZNF326*</i>             | BW999974 | 3q | scaffold-ma2 | 2.00E-77  | 120  | 224940437 | 224940586 |
| <i>YIPF1</i>               | BW999975 | 3q | scaffold-ma3 | 6.00E-52  | 112  | 127724189 | 127724353 |
| <i>BCAS2</i>               | AU312354 | 3q | scaffold-ma3 | 3.00E-51  | 141  | 151621402 | 151621229 |
| <i>KIAA1219</i>            | BW999976 | 3q | scaffold-ma3 | 4.00E-101 | 158  | 155122635 | 155122844 |
| <i>STAU1</i>               | BW999977 | 3q | scaffold-ma3 | 2.00E-116 | 169  | 165663812 | 165663594 |
| <i>RBM12</i>               | BW999978 | 3q | scaffold-ma3 | 2.00E-152 | 406  | 154706304 | 154705780 |
| <i>TPT1</i>                | BW999979 | 4p | scaffold-ma4 | 2.00E-68  | 148  | 1006155   | 1006349   |
| <i>EIF2S3</i>              | AU312306 | 4p | scaffold-ma4 | 1.00E-111 | 126  | 49115724  | 49115885  |
| <i>SYAP1</i>               | AU312328 | 4p | scaffold-ma4 | 3.00E-96  | 121  | 46147275  | 46147135  |
| <i>DSCR3</i>               | AU312319 | 4q | scaffold-ma4 | 1.00E-74  | 119  | 60873037  | 60872873  |
| <i>DCAMKL1</i>             | BW999980 | 4q | scaffold-ma4 | 8.00E-49  | 110  | 86291138  | 86291302  |
| <i>ELMOD1</i>              | BW999981 | 4q | scaffold-ma4 | 1.00E-56  | 147  | 93207704  | 93207522  |
| <i>BCCIP</i>               | AU312307 | 5q | scaffold-ma5 | 1.00E-46  | 148  | 32597249  | 32597061  |
| <i>SH3MD1</i>              | AU312347 | 5q | scaffold-ma5 | 2.00E-119 | 378  | 45831798  | 45832379  |
| <i>PPP1R7</i>              | BW999982 | 5q | scaffold-ma5 | 2.00E-92  | 228  | 56956062  | 56955736  |
| <i>PDCD10</i>              | AU312342 | 5q | scaffold-ma5 | 4.00E-61  | 143  | 74805371  | 74805547  |
| <i>TLOC1</i>               | AU312335 | 5q | scaffold-ma5 | 2.00E-45  | 101  | 76109988  | 76110125  |
| <i>UCHL1*</i>              | BW999983 | 6p | scaffold-ma7 | 4.00E-89  | 210  | 33298090  | 33298407  |
| <i>GNAI2*</i>              | BW999984 | 6p | scaffold-ma2 | 2.00E-106 | 126  | 49893686  | 49893841  |
| <i>P4HB*</i>               | BW999985 | 6p | scaffold-ma2 | 2.00E-69  | 100  | 97717890  | 97718012  |

|                             |          |       |               |           |      |          |          |
|-----------------------------|----------|-------|---------------|-----------|------|----------|----------|
| <i>FLJ12571</i>             | AU312352 | 6q    | scaffold-ma6  | 2.00E-46  | 117  | 46698606 | 46698752 |
| <i>RANGAPI</i>              | AU312313 | 6q    | scaffold-ma6  | 7.00E-71  | 95   | 47795604 | 47795500 |
| <i>LDHB</i>                 | BW999986 | 6q    | scaffold-ma6  | 2.00E-60  | 117  | 69268248 | 69268418 |
| <i>SEC3L1</i>               | AU312345 | 7p    | scaffold-ma7  | 3.00E-58  | 125  | 55644074 | 55643916 |
| <i>KIAA1109</i>             | AU312348 | 7q    | scaffold-ma7  | 2.00E-60  | 124  | 30398905 | 30398711 |
| <i>RAP1GDS1</i>             | AU312351 | 7q    | scaffold-ma7  | 2.00E-91  | 112  | 12141068 | 12140931 |
| <i>GAD2</i>                 | BW999991 | Zp    | scaffold-Z    | 1.00E-109 | 136  | 17484512 | 17484336 |
| <i>WAC</i>                  | AU312355 | Zp    | scaffold-Z    | 3.00E-93  | 209  | 16303681 | 16303947 |
| <i>KLF6*</i>                | BW999992 | Zp    | scaffold-ma2  | 1.00E-99  | 366  | 47130305 | 47130796 |
| <i>LOC90693<sup>#</sup></i> | BW999993 | Zp    | scaffold-ma7  | 4.00E-127 | 301  | 34444161 | 34444577 |
| <i>LOC90693<sup>#</sup></i> | BW999993 | Zp    | scaffold-Z    | 1.00E-107 | 291  | 34827559 | 34827182 |
| <i>TAX1BP1</i>              | AU312320 | Zp    | scaffold-Z    | 1.00E-86  | 141  | 36989995 | 36990174 |
| <i>RAB5A</i>                | BW999994 | Zp    | scaffold-Z    | 9.00E-94  | 166  | 40227424 | 40227215 |
| <i>CTNNB1</i>               | BW999995 | Zcen  | scaffold-Z    | 3.00E-129 | 275  | 49548885 | 49549226 |
| <i>AMPH</i>                 | BW999996 | Zcen  | scaffold-Z    | 1.00E-66  | 101  | 55612836 | 55612955 |
| <i>TUBG1</i>                | BW999997 | Zq    | scaffold-Z    | 5.00E-89  | 116  | 17359265 | 17359113 |
| <i>GHI</i>                  | BW999998 | Zq    | scaffold-Z    | 2.00E-115 | 179  | 77397011 | 77396727 |
| <i>MYST2</i>                | BW999999 | Zq    | scaffold-Z    | 6.00E-122 | 293  | 90785118 | 90784714 |
| <i>NEF3</i>                 | BW999987 | micro | scaffold-mi1  | 1.00E-102 | 352  | 13833430 | 13832942 |
| <i>ASB6</i>                 | AU312340 | micro | scaffold-mi7  | 1.00E-95  | 161  | 6270589  | 6270353  |
| <i>RPL12</i>                | BW999988 | micro | scaffold-mi7  | 6.00E-67  | 95.5 | 7974658  | 7974542  |
| <i>FLJ25530</i>             | AU312336 | micro | scaffold-mi1  | 4.00E-98  | 255  | 8157147  | 8156806  |
| <i>HSPA8<sup>#</sup></i>    | BW999989 | micro | scaffold-ma1  | 2.00E-124 | 236  | 20422342 | 20422662 |
| <i>HSPA8<sup>#</sup></i>    | BW999989 | micro | scaffold-mi1  | 3.00E-123 | 259  | 2089357  | 2089025  |
| <i>GLCE</i>                 | AU312330 | micro | scaffold-mi10 | 1.00E-79  | 234  | 24861    | 24577    |
| <i>POLG</i>                 | AU312315 | micro | scaffold-mi3  | 4.00E-97  | 116  | 10042696 | 10042845 |
| <i>LOC283820</i>            | AU312323 | micro | scaffold-mi5  | 8.00E-71  | 116  | 3659851  | 3659708  |
| <i>PARN</i>                 | AU312312 | micro | scaffold-mi7  | 1.00E-66  | 73.9 | 12029447 | 12029361 |
| <i>ATRX</i>                 | BW999990 | micro | scaffold-mi4  | 3.00E-63  | 102  | 1268001  | 1268126  |

754 **Supplemental Table S7.** Details of mismatched cDNA markers from *Elaphe quadrivirgata* (Matsubara  
 755 et al. 2006), their locations in *Crotalus* and *Anolis*, and notes on likelihood of misassembly based on  
 756 synteny and intrachromosomal Hi-C.

| Marker        | <i>Elaphe</i> Chromosome | <i>Crotalus</i> Scaffold | <i>Anolis</i> Scaffold | Notes                                                                                                                                                                         |
|---------------|--------------------------|--------------------------|------------------------|-------------------------------------------------------------------------------------------------------------------------------------------------------------------------------|
| <i>NOSIP</i>  | 2q                       | scaffold-Z               | 6                      | Unique or erroneous original cDNA placement; <i>Anolis</i> and <i>Crotalus</i> synteny suggest correct placement in <i>Crotalus</i> ; Hi-C data inconsistent with misassembly |
| <i>ZNF326</i> | 3q                       | scaffold-ma2             | 4                      | Possible misassembly error; <i>Anolis</i> and <i>Elaphe</i> synteny suggest incorrect placement in <i>Crotalus</i> ; Hi-C data consistent with regional misassembly           |
| <i>UCHL1</i>  | 6p                       | scaffold-ma7             | 5                      | Hit to <i>Anolis</i> 5 is inconclusive because it is syntenic with snake chromosomes 6 & 7; Hi-C data inconsistent with misassembly                                           |
| <i>GNAI2</i>  | 6p                       | scaffold-ma2             | 2                      | Unique or erroneous original cDNA placement; <i>Anolis</i> and <i>Crotalus</i> synteny suggest correct placement in <i>Crotalus</i> ; Hi-C data inconsistent with misassembly |
| <i>P4HB</i>   | 6p                       | scaffold-ma2             | 2                      | Unique or erroneous original cDNA placement; <i>Anolis</i> and <i>Crotalus</i> synteny suggest correct placement in <i>Crotalus</i> ; Hi-C data inconsistent with misassembly |
| <i>KLF6</i>   | Zp                       | scaffold-ma2             | 6                      | Possible misassembly error; <i>Anolis</i> and <i>Elaphe</i> synteny suggest incorrect placement in <i>Crotalus</i> ; Hi-C data inconsistent with misassembly                  |

757

758 **Supplemental Table S8.** GC variation in windows of various sizes for 12 squamate species. Values for  
 759 each species are measured as the standard deviation (SD) of GC content in all sampled windows of a  
 760 given size. Information for 5, 20, and 80 kb windows are also presented in Fig. 1c. Missing data (i.e.,  
 761 window sizes that were too large and contained greater than the threshold allowed missing data) are  
 762 denoted with '-'.  
 763

| Window Size (bp) | <i>Gekko japonicus</i> | <i>Eublepharis macularius</i> | <i>Ophisaurus gracilis</i> | <i>Shinisaurus crocodilurus</i> | <i>Pogona vitticeps</i> | <i>Anolis carolinensis</i> |
|------------------|------------------------|-------------------------------|----------------------------|---------------------------------|-------------------------|----------------------------|
| 5,000            | 0.039295606            | 0.037140406                   | 0.037038224                | 0.03488877                      | 0.03681681              | 0.032312269                |
| 20,000           | 0.028980944            | 0.027338004                   | 0.029217483                | 0.027425317                     | 0.030930264             | 0.021209                   |
| 40,000           | 0.025219459            | 0.024838347                   | 0.027141528                | 0.025322106                     | 0.029367252             | 0.017608402                |
| 80,000           | 0.021385708            | 0.023326607                   | 0.025558162                | 0.023843432                     | 0.028238318             | 0.015121097                |
| 160,000          | 0.01811246             | 0.022646783                   | 0.024536212                | 0.022632678                     | 0.027330318             | 0.013089382                |
| 240,000          | -                      | 0.022203903                   | 0.023356372                | 0.021943776                     | 0.026943855             | 0.012088733                |
| 320,000          | -                      | 0.022121291                   | 0.022899173                | 0.021312719                     | 0.026617904             | 0.011287772                |

  

| Window Size (bp) | <i>Boa constrictor</i> | <i>Python molurus</i> | <i>Ophiophagus hannah</i> | <i>Thamnophis sirtalis</i> | <i>Deinagkistro don acutus</i> | <i>Crotalus viridis</i> |
|------------------|------------------------|-----------------------|---------------------------|----------------------------|--------------------------------|-------------------------|
| 5,000            | 0.043942864            | 0.042024505           | 0.040098669               | 0.047076022                | 0.047062019                    | 0.041210929             |
| 20,000           | 0.034934365            | 0.035837726           | 0.031894398               | 0.037865804                | 0.03882085                     | 0.032232558             |
| 40,000           | 0.030576918            | 0.033337717           | 0.028952912               | 0.03429097                 | 0.036517713                    | 0.029884634             |
| 80,000           | 0.023292703            | 0.030197592           | 0.026685436               | 0.031202717                | 0.034964163                    | 0.0281043               |
| 160,000          | 0.014736549            | 0.02736241            | 0.024597185               | 0.02894796                 | 0.033486765                    | 0.026806291             |
| 240,000          | -                      | 0.024725646           | 0.023968494               | 0.026250057                | 0.032562166                    | 0.02616041              |
| 320,000          | -                      | 0.023707617           | 0.023468328               | 0.024606171                | 0.031784231                    | 0.025840409             |

764

765

766 **Supplemental Table S9.** Details of Illumina Nextera resequencing and RNAseq libraries used for  
 767 comparative female/male read coverage across the rattlesnake genome and sex-specific gene expression  
 768 analyses. Raw read data are available on NCBI under accession PRJNA476794.

| Library Type     | Read Length       | Sample ID | Tissue | Sex    | Number of Mapped Reads |
|------------------|-------------------|-----------|--------|--------|------------------------|
| Illumina Nextera | 150 bp paired end | CV0007    | Liver  | Male   | 20,279,801             |
| Illumina Nextera | 150 bp paired end | CV0011    | Liver  | Female | 4,975,491              |
| RNAseq           | 100 bp paired end | Cv3       | Liver  | Female | 3,774,322              |
| RNAseq           | 100 bp paired end | Cv8       | Liver  | Female | 3,680,195              |
| RNAseq           | 100 bp paired end | Cv3       | Kidney | Female | 3,256,208              |
| RNAseq           | 100 bp paired end | Cv3       | Kidney | Female | 4,565,008              |
| RNAseq           | 100 bp paired end | Cv5       | Liver  | Male   | 3,330,125              |
| RNAseq           | 100 bp paired end | Cv6       | Liver  | Male   | 3,837,264              |
| RNAseq           | 100 bp paired end | Cv5       | Kidney | Male   | 3,729,811              |
| RNAseq           | 100 bp paired end | Cv6       | Kidney | Male   | 4,673,928              |

769

770 **Supplemental Table S10.** Representative sequences for known snake venom gene families used to  
 771 annotate venom genes in the rattlesnake genome.

| Gene Family                                        | Accession      | Sequence Type | Species                             |
|----------------------------------------------------|----------------|---------------|-------------------------------------|
| 5'Nucleotidase                                     | AK291667.1     | mRNA          | <i>Homo sapiens</i>                 |
| Acetylcholinesterase                               | U54591.1       | mRNA          | <i>Bungarus fasciatus</i>           |
| AVIt toxin                                         | EU195459.1     | mRNA          | <i>Varanus komodoensis</i>          |
| C-type Lectin                                      | JF895761.1     | mRNA          | <i>Crotalus oreganus helleri</i>    |
| Cobra Venom Factor                                 | U09969.2       | mRNA          | <i>Naja kaouthia</i>                |
| CRISP (cysteine-rich secretory protein)            | HQ414088.1     | mRNA          | <i>Crotalus adamanteus</i>          |
| Cystatin                                           | FJ411289.1     | mRNA          | <i>Naja kaouthia</i>                |
| Extendin                                           | EU790960.1     | mRNA          | <i>Heloderma suspectum</i>          |
| Exonuclease                                        | XM_015826835.1 | mRNA          | <i>Protobothrops mucrosquamatus</i> |
| Hyaluronidase                                      | HQ414098.1     | mRNA          | <i>Crotalus adamanteus</i>          |
| LAO (L-amino acid oxidase)                         | HQ414099.1     | mRNA          | <i>Crotalus adamanteus</i>          |
| SVMP I (class I snake venom metalloproteinase)     | HM443635.1     | mRNA          | <i>Bothrops neuwiedi</i>            |
| SVMP II (class II snake venom metalloproteinase)   | HM443637.1     | mRNA          | <i>Bothrops neuwiedi</i>            |
| SVMP III (class III snake venom metalloproteinase) | HM443632.1     | mRNA          | <i>Bothrops neuwiedi</i>            |
| Nerve growth factor                                | AF306533.1     | mRNA          | <i>Crotalus durissus terrificus</i> |
| Phosphodiesterase                                  | HQ414102.1     | mRNA          | <i>Crotalus adamanteus</i>          |
| PLA2-I (vipers)                                    | AF403134.1     | mRNA          | <i>Crotalus viridis viridis</i>     |
| PLA2-II (elapids)                                  | GU190815.1     | mRNA          | <i>Bungarus flaviceps</i>           |
| Sarafotoxin                                        | L07528.1       | mRNA          | <i>Atractaspis engaddensis</i>      |
| Serine Proteinase                                  | HQ414121.1     | mRNA          | <i>Crotalus adamanteus</i>          |
| 3FTX (Three-finger Toxin)                          | DQ273582.1     | mRNA          | <i>Ophiophagus hannah</i>           |
| Veficolin                                          | GU065323.1     | mRNA          | <i>Cerberus rynchops</i>            |
| VEGF (Vascular Endothelial Growth Factor)          | AB848141.1     | mRNA          | <i>Protobothrops mucrosquamatus</i> |
| Vespryn                                            | EU401840.1     | mRNA          | <i>Oxyuranus scutellatus</i>        |
| Waprin                                             | EU401843.1     | mRNA          | <i>Oxyuranus scutellatus</i>        |
| Kunitz (serine peptidase inhibitor, Kunitz type)   | JU173666.1     | mRNA          | <i>Crotalus adamanteus</i>          |
| Thrombin-like (thrombin-like venom gland enzyme)   | AJ001209.1     | mRNA          | <i>Deinagkistrodon acutus</i>       |
| Ficolin                                            | GBUG01000048.1 | mRNA          | <i>Echis coloratus</i>              |
| Disintegrin                                        | AJ131345.1     | mRNA          | <i>Deinagkistrodon acutus</i>       |
| FactorV (venom coagulation factor V)               | XM_015815922.1 | mRNA          | <i>Protobothrops mucrosquamatus</i> |
| FactorX                                            | XM_015819885.1 | mRNA          | <i>Protobothrops mucrosquamatus</i> |
| Prokineticin                                       | XM_015822870.1 | mRNA          | <i>Protobothrops mucrosquamatus</i> |
| Ohanin (ohanim-like)                               | XM_015818414.1 | mRNA          | <i>Protobothrops mucrosquamatus</i> |
| Complement C3 (Cadam VF)                           | JU173742.1     | mRNA          | <i>Crotalus adamanteus</i>          |

|                                                                                                            |                |         |                                     |
|------------------------------------------------------------------------------------------------------------|----------------|---------|-------------------------------------|
| Crotasin                                                                                                   | AF250212.1     | mRNA    | <i>Crotalus durissus terrificus</i> |
| Endothelin                                                                                                 | XM_015810852.1 | mRNA    | <i>Protobothrops mucrosquamatus</i> |
| Kallikrein                                                                                                 | GALC01000005.1 | mRNA    | <i>Crotalus oreganus helleri</i>    |
| <i>Lynx1</i> (Ly6/neurotoxin 1)                                                                            | XM_014066791.1 | mRNA    | <i>Thamnophis sirtalis</i>          |
| Natriuretic Peptide (bradykinin potentiating peptide and C-type natriuretic peptide precursor isoform 2)   | AF308594.2     | mRNA    | <i>Crotalus durissus terrificus</i> |
| <i>sPla</i> /ryanodine receptor                                                                            | XM_015823102.1 | mRNA    | <i>Protobothrops mucrosquamatus</i> |
| <i>WAP</i> four-disulfide core domain protein 5 (Whey Acidic Protein/secretory leuki proteinase inhibitor) | XM_015822353.1 | mRNA    | <i>Protobothrops mucrosquamatus</i> |
| Myotoxin                                                                                                   | HQ414100.1     | mRNA    | <i>Crotalus adamanteus</i>          |
| <i>PLA2</i>                                                                                                | APD70899.1     | protein | <i>Crotalus atrox</i>               |
| <i>SVMP</i>                                                                                                | Q90282.1       | protein | <i>Crotalus atrox</i>               |
| Serine Proteinase                                                                                          | F8S114.1       | protein | <i>Crotalus adamanteus</i>          |

---



773 **Supplemental Table S11.** Annotated venom gene homologs in the Prairie rattlesnake Genome. Genes  
 774 were annotated using materials detailed in Supplemental Table 8.

| <b>Venom Gene Family</b>                        | <b>Scaffold</b> | <b>Start Position (bp)</b> | <b>End Position (bp)</b> |
|-------------------------------------------------|-----------------|----------------------------|--------------------------|
| 3-Finger toxin                                  | scaffold-ma1    | 103004868                  | 103021927                |
| 3-Finger toxin                                  | scaffold-ma1    | 102999393                  | 103000958                |
| 5' Nucleotidase                                 | scaffold-ma5    | 46133017                   | 46179118                 |
| 5' Nucleotidase                                 | scaffold-ma6    | 55711914                   | 55732365                 |
| 5' Nucleotidase                                 | scaffold-mi1    | 18004217                   | 18021456                 |
| 5' Nucleotidase                                 | scaffold-ma2    | 45090212                   | 45121335                 |
| 5' Nucleotidase                                 | scaffold-ma2    | 134237148                  | 134264183                |
| Acetylcholinesterase                            | scaffold-ma2    | 4047955                    | 4053281                  |
| Acetylcholinesterase                            | scaffold-ma2    | 3948506                    | 3952373                  |
| Acetylcholinesterase                            | scaffold-ma2    | 4016363                    | 4018146                  |
| Acetylcholinesterase                            | scaffold-ma2    | 4026170                    | 4045822                  |
| Acetylcholinesterase                            | scaffold-ma5    | 73971094                   | 73976212                 |
| Acetylcholinesterase                            | scaffold-ma5    | 74015346                   | 74036663                 |
| Acetylcholinesterase                            | scaffold-un210  | 16032                      | 17552                    |
| Bradykinin potentiating and natriuretic peptide | scaffold-un187  | 22386                      | 23524                    |
| C-type lectin                                   | scaffold-mi5    | 3276042                    | 3284747                  |
| C-type lectin                                   | scaffold-mi5    | 11650747                   | 11653723                 |
| C-type lectin                                   | scaffold-Z      | 21883578                   | 21895509                 |
| C-type lectin                                   | scaffold-Z      | 21706900                   | 21776775                 |
| C-type lectin                                   | scaffold-Z      | 21786524                   | 21797211                 |
| C-type lectin                                   | scaffold-Z      | 108214710                  | 108236532                |
| Cysteine-rich secretory protein                 | scaffold-ma1    | 169434958                  | 169437996                |
| Cysteine-rich secretory protein                 | scaffold-ma1    | 169423774                  | 169434684                |
| Cysteine-rich secretory protein                 | scaffold-ma3    | 25391938                   | 25416947                 |
| Cysteine-rich secretory protein                 | scaffold-mi6    | 1021447                    | 1040191                  |
| Exonuclease                                     | scaffold-mi7    | 8097114                    | 8103411                  |
| Exonuclease                                     | scaffold-ma1    | 5804894                    | 5842638                  |
| Exonuclease                                     | scaffold-mi3    | 10271502                   | 10274220                 |
| Exonuclease                                     | scaffold-ma6    | 12590208                   | 12591465                 |
| Factor V                                        | scaffold-mi4    | 8493826                    | 8518402                  |
| Factor V                                        | scaffold-mi4    | 8479637                    | 8493564                  |
| Factor V                                        | scaffold-ma4    | 81074882                   | 81113119                 |
| Glutaminyl cyclase                              | scaffold-ma1    | 256551622                  | 256564040                |
| Glutaminyl cyclase                              | scaffold-mi7    | 5091107                    | 5094268                  |
| Hyaluronidase                                   | scaffold-ma6    | 14952252                   | 14955850                 |
| Hyaluronidase                                   | scaffold-ma2    | 45901201                   | 45920587                 |
| Hyaluronidase                                   | scaffold-ma2    | 49137409                   | 49145188                 |
| Hyaluronidase                                   | scaffold-ma2    | 49106981                   | 49118469                 |
| Kunitz peptide                                  | scaffold-mi7    | 3590975                    | 3597607                  |
| Kunitz peptide                                  | scaffold-mi8    | 4992795                    | 5002390                  |

|                                    |              |           |           |
|------------------------------------|--------------|-----------|-----------|
| L-amino acid oxidase               | scaffold-ma4 | 56914906  | 56948498  |
| L-amino acid oxidase               | scaffold-ma4 | 85461961  | 85468906  |
| L-amino acid oxidase               | scaffold-ma2 | 4658599   | 4661642   |
| L-amino acid oxidase               | scaffold-ma2 | 4654769   | 4658293   |
| Myotoxin/crotamine                 | scaffold-ma1 | 289328153 | 289328605 |
| Nerve growth factor                | scaffold-Z   | 93342025  | 93347811  |
| Nerve growth factor                | scaffold-ma1 | 76711308  | 76727703  |
| Phospholipase A2                   | scaffold-mi7 | 3019970   | 3021876   |
| Phospholipase A2                   | scaffold-mi7 | 3027607   | 3029199   |
| Phospholipase A2                   | scaffold-mi7 | 3031464   | 3033348   |
| Phospholipase A2                   | scaffold-mi7 | 3037103   | 3038488   |
| Phospholipase A2                   | scaffold-mi7 | 3042118   | 3043697   |
| Serine Proteinase                  | scaffold-mi2 | 8569773   | 8575182   |
| Serine Proteinase                  | scaffold-mi2 | 8588278   | 8593660   |
| Serine Proteinase                  | scaffold-mi2 | 8628274   | 8636651   |
| Serine Proteinase                  | scaffold-mi2 | 8664603   | 8670797   |
| Serine Proteinase                  | scaffold-mi2 | 8739986   | 8745649   |
| Serine Proteinase                  | scaffold-mi2 | 8752578   | 8759324   |
| Serine Proteinase                  | scaffold-mi2 | 8864675   | 8879153   |
| Serine Proteinase                  | scaffold-mi2 | 8937526   | 8947481   |
| Serine Proteinase                  | scaffold-mi2 | 8960028   | 8980478   |
| Snake venom metalloproteinase      | scaffold-mi1 | 13901629  | 14014239  |
| Snake venom metalloproteinase      | scaffold-mi1 | 14022082  | 14075370  |
| Snake venom metalloproteinase      | scaffold-mi1 | 14091987  | 14112667  |
| Snake venom metalloproteinase      | scaffold-mi1 | 14147865  | 14170405  |
| Snake venom metalloproteinase      | scaffold-mi1 | 14174872  | 14190142  |
| Snake venom metalloproteinase      | scaffold-mi1 | 14211673  | 14242249  |
| Snake venom metalloproteinase      | scaffold-mi1 | 14248933  | 14272689  |
| Snake venom metalloproteinase      | scaffold-mi1 | 14281564  | 14300774  |
| Snake venom metalloproteinase      | scaffold-mi1 | 14368422  | 14393313  |
| Snake venom metalloproteinase      | scaffold-mi1 | 14401627  | 14424637  |
| Snake venom metalloproteinase      | scaffold-mi1 | 14310844  | 14338336  |
| Veficolin/Ficolin                  | scaffold-mi7 | 5271880   | 5282014   |
| Veficolin/Ficolin                  | scaffold-ma3 | 179788950 | 179790745 |
| Veficolin/Ficolin                  | scaffold-ma1 | 232337083 | 232340714 |
| Veficolin/Ficolin                  | scaffold-ma1 | 232312034 | 232335439 |
| Vascular endothelial growth factor | scaffold-ma7 | 40288572  | 40327884  |
| Vascular endothelial growth factor | scaffold-ma1 | 40733075  | 40747358  |
| Vascular endothelial growth factor | scaffold-ma1 | 260248287 | 260272500 |
| Venom Factor                       | scaffold-Z   | 79798672  | 79803249  |
| Venom Factor                       | scaffold-Z   | 79749464  | 79761456  |
| Venom Factor                       | scaffold-ma2 | 1573588   | 1616446   |
| Venom Factor                       | scaffold-ma2 | 137559964 | 137560374 |

|                |              |           |           |
|----------------|--------------|-----------|-----------|
| Venom Factor   | scaffold-ma2 | 137553669 | 137558461 |
| Venom Factor   | scaffold-ma2 | 137623562 | 137648584 |
| Venom Factor   | scaffold-ma2 | 137651285 | 137653877 |
| Venom Factor   | scaffold-ma2 | 137710627 | 137728987 |
| Venom Factor   | scaffold-ma2 | 137753804 | 137775039 |
| Venom Factor   | scaffold-ma2 | 137735629 | 137741352 |
| Vespryn/Ohanin | scaffold-ma2 | 4377779   | 4385668   |
| Vespryn/Ohanin | scaffold-ma2 | 109834300 | 109838076 |
| Waprin         | scaffold-ma1 | 204655764 | 204666466 |

---

776 **Supplemental Table S12.** Transcription factors significantly upregulated in the venom gland. Mean  
 777 distances summarize the distribution of distances between gene venom genes and non-venom genes and  
 778 the nearest predicted binding site of each transcription factor. No position weight matrix for *NCOA2* was  
 779 available for a close relative to the rattlesnake, and the *NFI* family transcription factors have a conserved  
 780 binding motif, and are summarized together under *NFIA*. P-values are from *t*-test comparisons of distance  
 781 distributions.

| Gene ID        | Rattlesnake Gene Detail                           | Mean Distance to Venom Gene (bp) | Mean Distance to Non-venom Gene (bp) | p-value  |
|----------------|---------------------------------------------------|----------------------------------|--------------------------------------|----------|
| <i>ATF6</i>    | augustus_masked-scaffold-ma3-processed-gene-300.3 | 421,305.1                        | 595,006.2                            | 0.002793 |
| <i>ELF5</i>    | maker-scaffold-ma1-augustus-gene-235.5            | 1,121.3                          | 1,203.9                              | 0.7953   |
| <i>FOXC2</i>   | augustus_masked-scaffold-mi6-processed-gene-2.1   | 202,416.2                        | 251,898.5                            | 0.02967  |
| <i>CREB3L2</i> | maker-scaffold-ma6-augustus-gene-195.2            | 32,227.9                         | 29,708.3                             | 0.5558   |
| <i>GRHL1</i>   | maker-scaffold-ma1-augustus-gene-601.8            | 78,954.0                         | 86,147.0                             | 0.4343   |
| <i>NCOA2</i>   | maker-scaffold-ma3-augustus-gene-89.6             | -                                | -                                    | -        |
| <i>NFIA</i>    | maker-scaffold-ma3-augustus-gene-414.2            | 336,765.8                        | 328,556.3                            | 0.7968   |
| <i>NFIB</i>    | maker-scaffold-ma2-augustus-gene-569.3            | -                                | -                                    | -        |
| <i>NFIB</i>    | maker-scaffold-ma2-augustus-gene-569.2            | -                                | -                                    | -        |
| <i>NFIX</i>    | maker-scaffold-ma2-augustus-gene-473.3            | -                                | -                                    | -        |
| <i>NR4A2</i>   | maker-scaffold-ma1-augustus-gene-428.4            | 100,375.5                        | 92,292.3                             | 0.492    |
| <i>SREBF2</i>  | maker-scaffold-ma6-augustus-gene-158.15           | 306,901.1                        | 328,081.4                            | 0.4302   |

782

783 **Supplemental Table S13.** Density of predicted *GRHL1* and *NFI* binding sites within given intervals of  
 784 venom genes and all nonvenom genes. P-values are reported from Fisher's exact tests, which compared  
 785 the number of predicted binding sites by the total length of sequenced searched between venom and  
 786 nonvenom gene sets.

| Transcription Factor | Interval (kb)  | Venom Gene Density | Nonvenom Gene Density | p-value |
|----------------------|----------------|--------------------|-----------------------|---------|
| <i>GRHL1</i>         | 100 kb         | 7.44E-06           | 8.03E-06              | 0.4022  |
| <i>GRHL1</i>         | 50 kb          | 1.49E-05           | 1.74E-05              | 0.2127  |
| <i>GRHL1</i>         | 10 kb          | 3.00E-05           | 2.78E-05              | 0.6875  |
| <i>GRHL1</i>         | 5 kb           | 4.44E-05           | 3.97E-05              | 0.554   |
| <i>NFI</i>           | Promoter (1kb) | 1.80E-03           | 1.43E-03              | 0.1305  |

787

## 788 3. SUPPLEMENTAL FIGURES

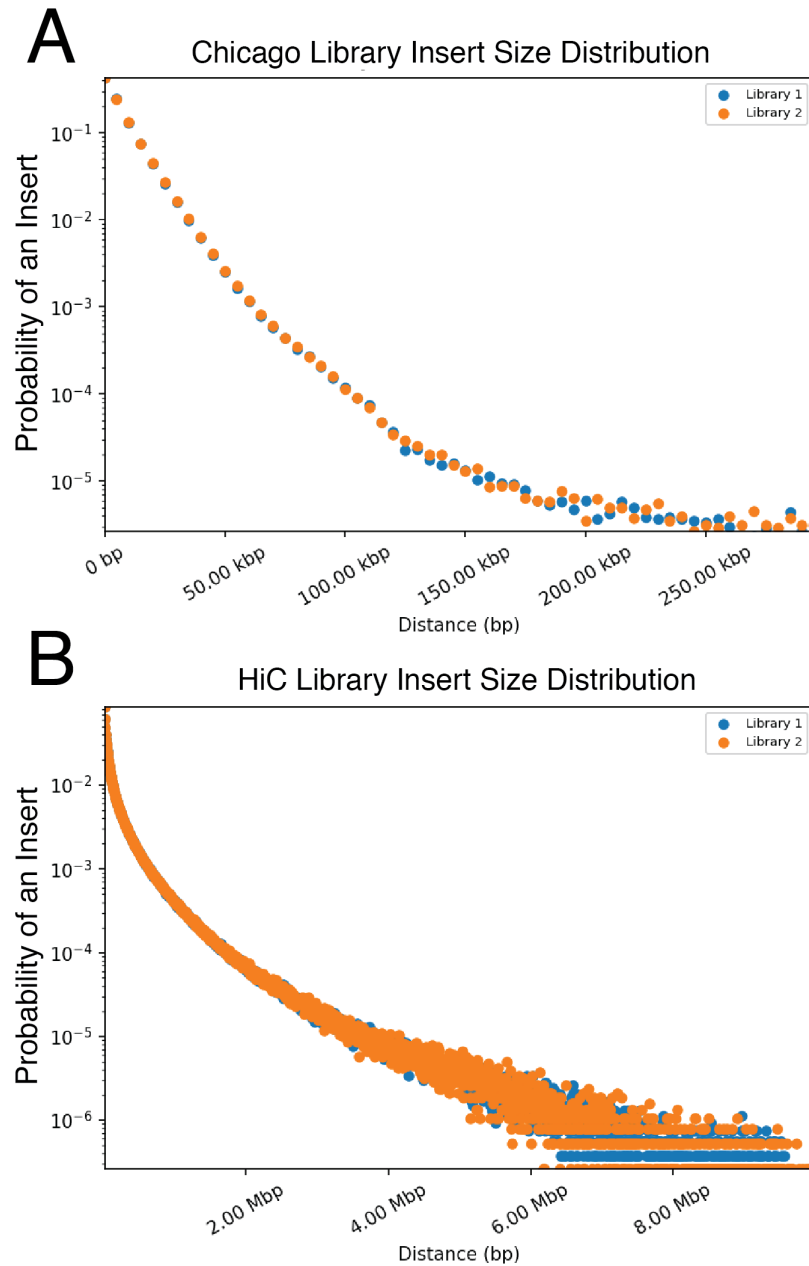

789

790 **Supplemental Figure S1.** Insert size probability distributions used in the Dovetail Genomics HiRise  
791 assembly method from paired Chicago (A) and Hi-C (B) datasets.

792

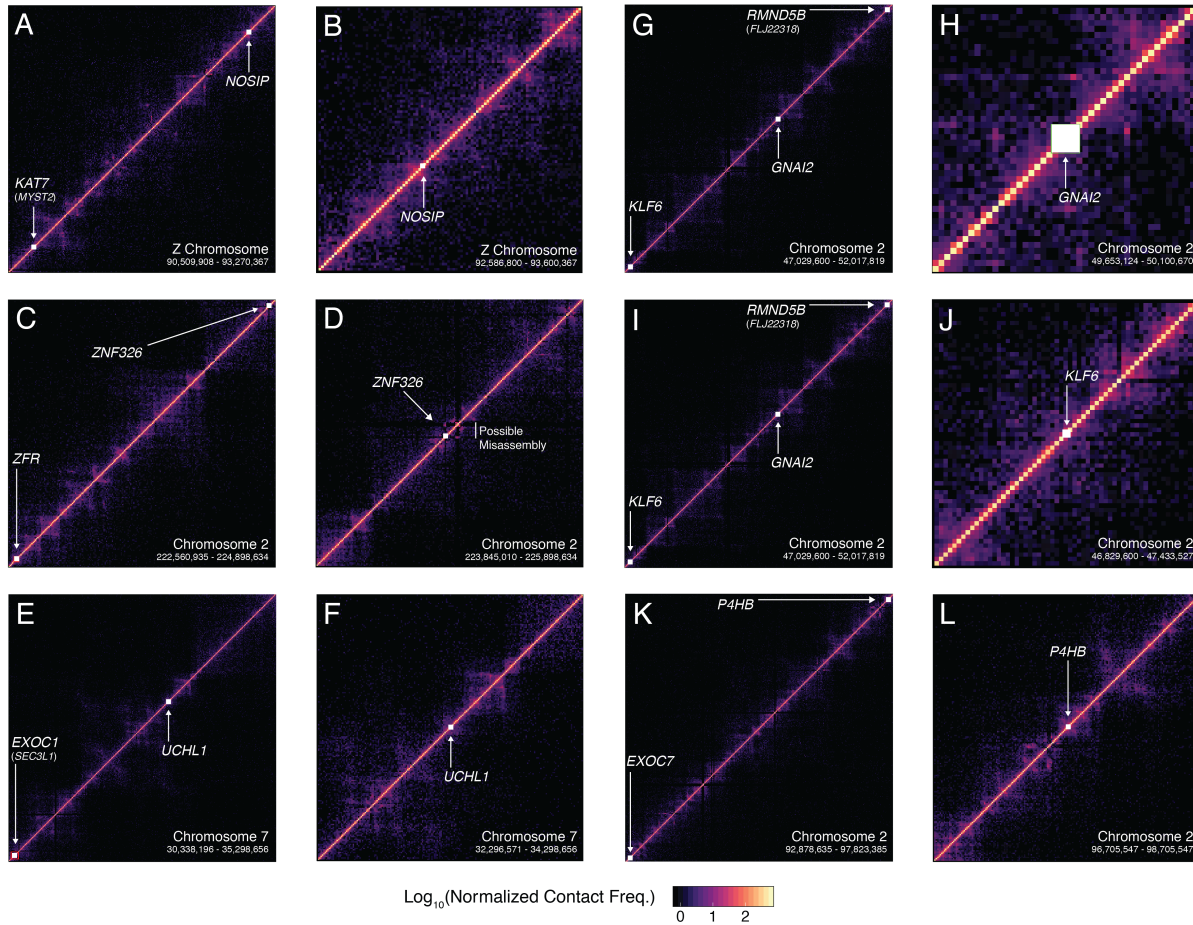

793

794 **Supplemental Figure S2.** Heatmaps of  $\text{Log}_{10}$  normalized intrachromosomal Hi-C contact frequencies  
 795 around mapping locations for cDNA markers from *Elaphe quadrivirgata* (Matsubara et al. 2006) in the  
 796 rattlesnake genome. For each of the six markers, panels showing the contact frequencies between the  
 797 focal marker and its nearest confirmed marker (see Supplemental Methods), and panels zoomed to  
 798 the region immediately around the focal marker are shown: *NOSIP* (A-B), *ZNF326* (C-D), *UCHL1* (E-F),  
 799 *GNAI2* (G-H), *KLF6* (I-J), and *P4HB* (K-L). Marker locations are shown with white squares, and  
 800 chromosomal coordinates for each panel are shown in the bottom right corner. The location of a potential  
 801 misassembly error is shown in panel D.

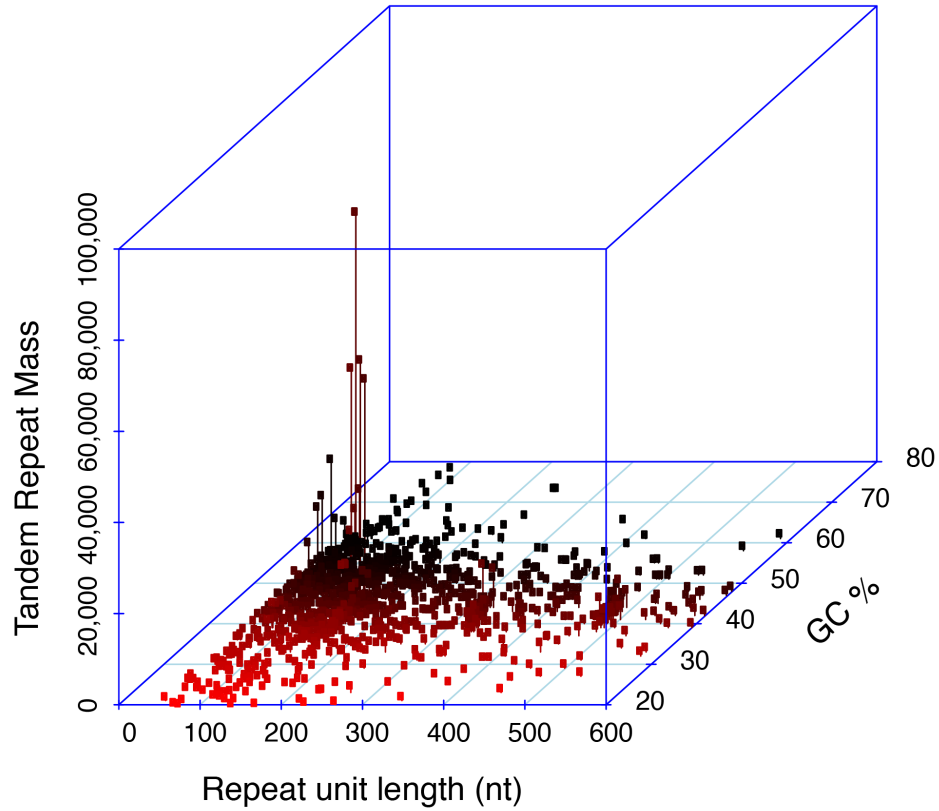

802

803 **Supplemental Figure S3.** Centromeric tandem repeat motif characterized using tandem repeats finder.  
804 Analysis of high frequency tandem repeats identified a 164-mer with high relative GC to the genomic  
805 background. The y-axis, tandem repeat mass, represents the relative abundance of tandem repeats of a  
806 given unit length and GC content.

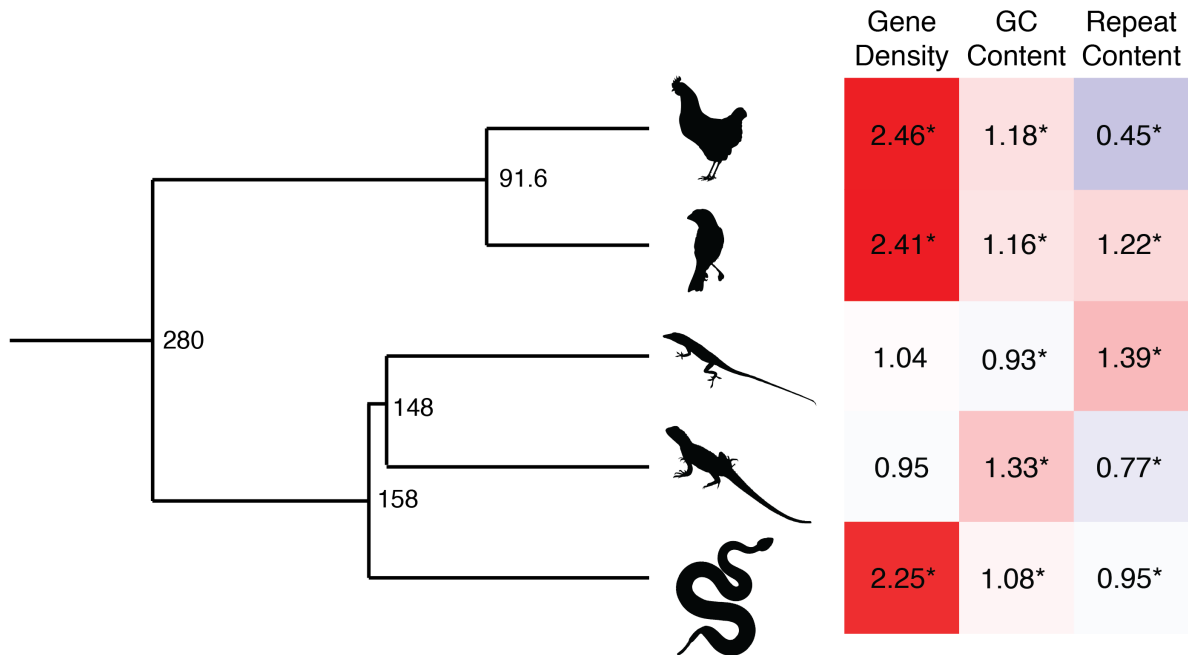

807

808 **Supplemental Figure S4.** Evolutionary patterns of genomic features of microchromosomes among  
 809 reptiles. Values at nodes on the phylogenetic tree represent the node age in millions of years, and were  
 810 obtained using median estimates from TimeTree. The heatmap to the right represents the relative  
 811 abundance of a given measure on microchromosomes versus macrochromosomes within each species  
 812 (blue values represent greater abundance on macrochromosomes and red values represent greater  
 813 abundance on microchromosomes). Values in each heatmap cell equal the ratio of each measure on  
 814 microchromosomes/macrochromosomes, and values with asterisks represent significant differences  
 815 between microchromosomes and macrochromosomes.



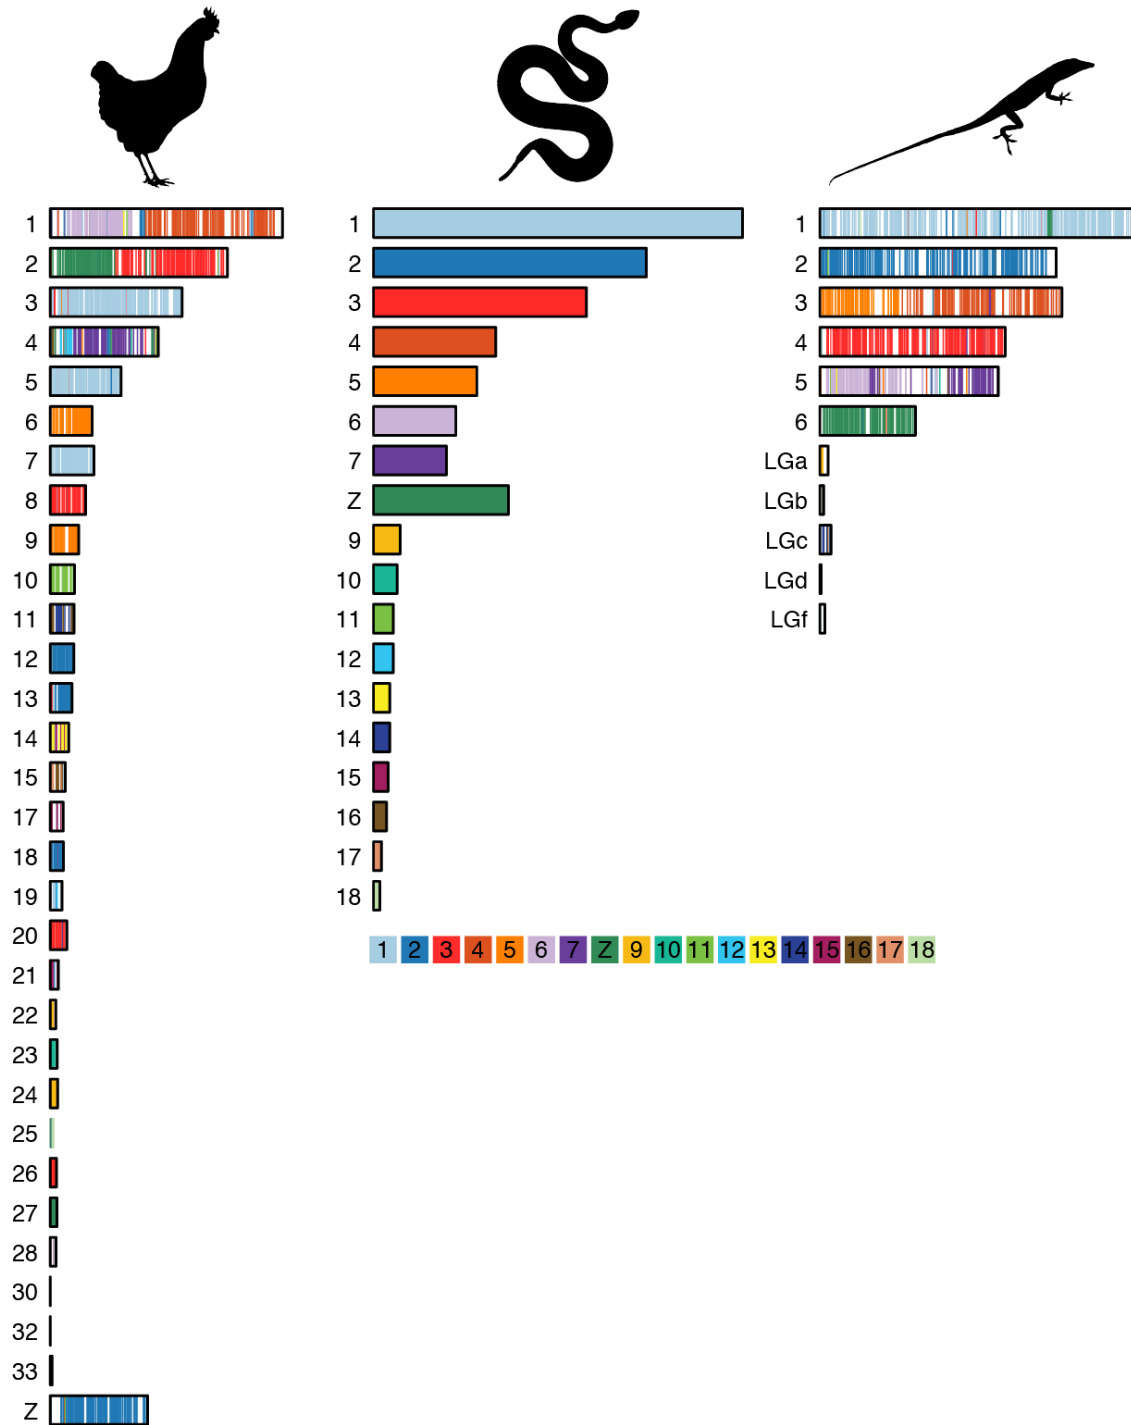

816

817

818

819

820

**Supplemental Figure S5.** Results of gene-based synteny analyses between the chicken (left), rattlesnake (center), and anole lizard (right). Chromosome numbers for each species are shown to the left of the chromosome ideograms, which are scaled by total length. Colors for chromosome paints are based on the rattlesnake genome.

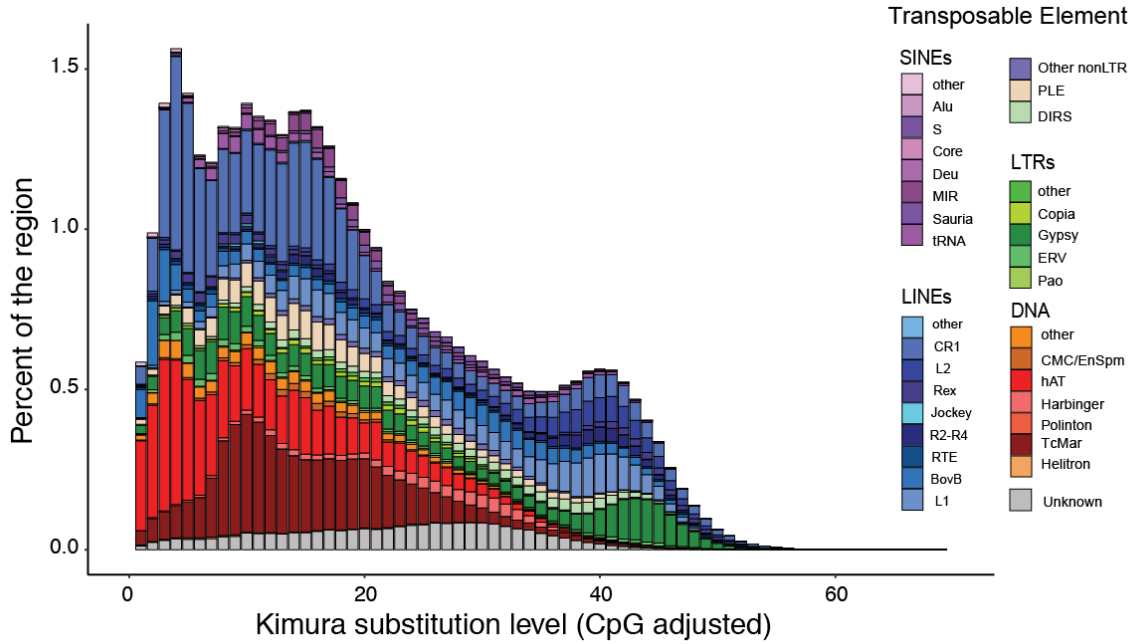

821

822 **Supplemental Figure S6.** Genomic repeat element abundance at a range of relative age values. Age is  
 823 measured using the Kimura substitution level of transposable elements when compared to a consensus  
 824 sequence. Transposable element types are colored according to the legend at the right.

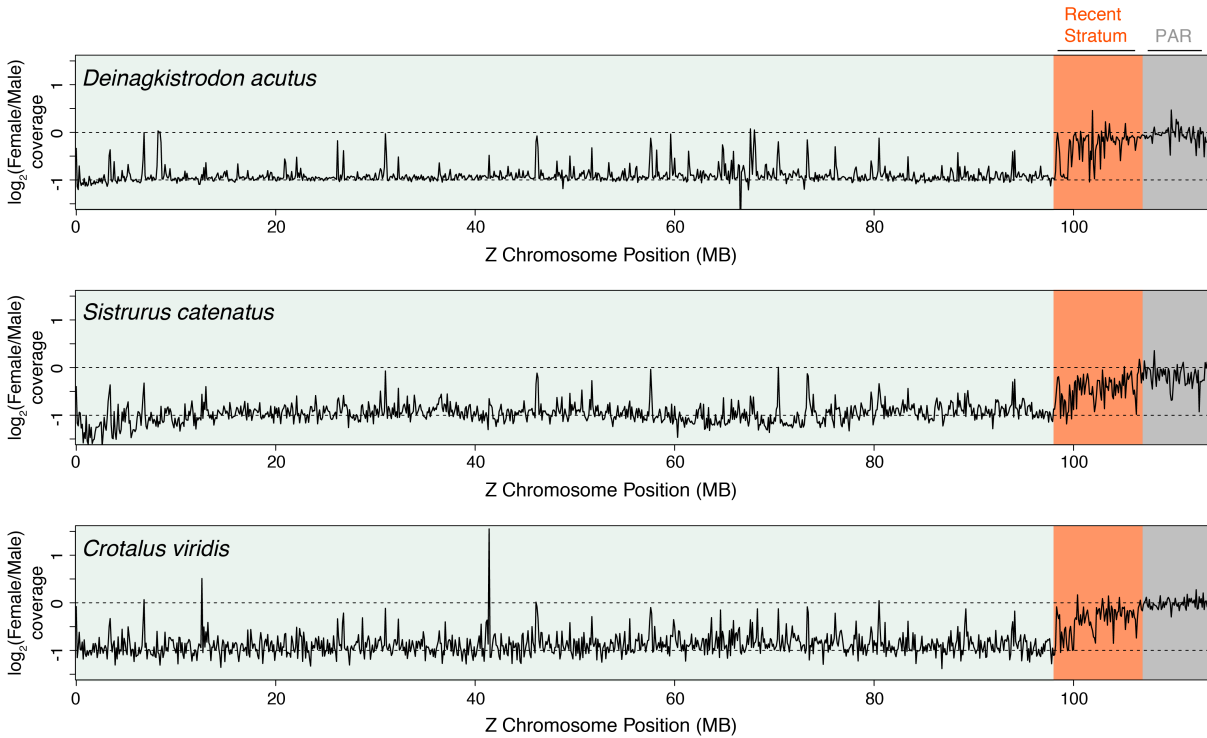

825

826 **Supplemental Figure S7.** Log<sub>2</sub> normalized female/male coverage ratio of pitviper species (Five Pace  
 827 viper (*Deinagkistrodon acutus*), Pygmy Rattlesnake (*Sistrurus catenatus*), and Prairie Rattlesnake  
 828 (*Crotalus viridis*), when mapped to the prairie rattlesnake reference genome. The dashed line at zero  
 829 represents the normalized coverage expectation for diploid loci, and the dashed line at -1 represents the  
 830 expectation of a hemizygous locus. Ratios are shown show values for each 100 kb window in a sliding  
 831 window analysis of coverage. Colored backgrounds depict the major regions discussed in the Main Text.

832

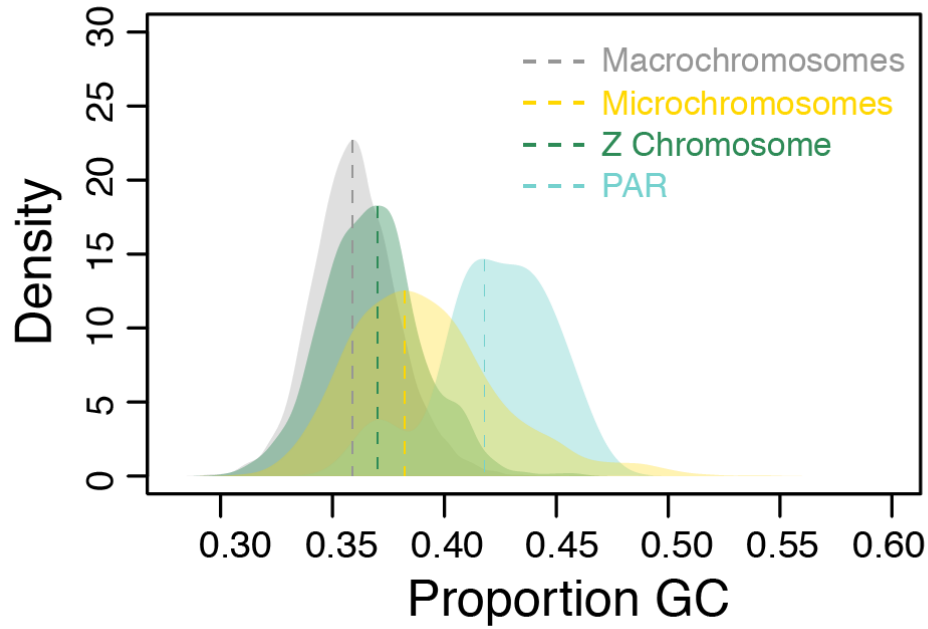

833 **Supplemental Figure S8.** Density distributions of GC content across Prairie Rattlesnake chromosomes,  
834 showing specific distributions of macrochromosomes, microchromosomes, the Z Chromosome, and the  
835 pseudoautosomal region (PAR) of the sex chromosomes, specifically.

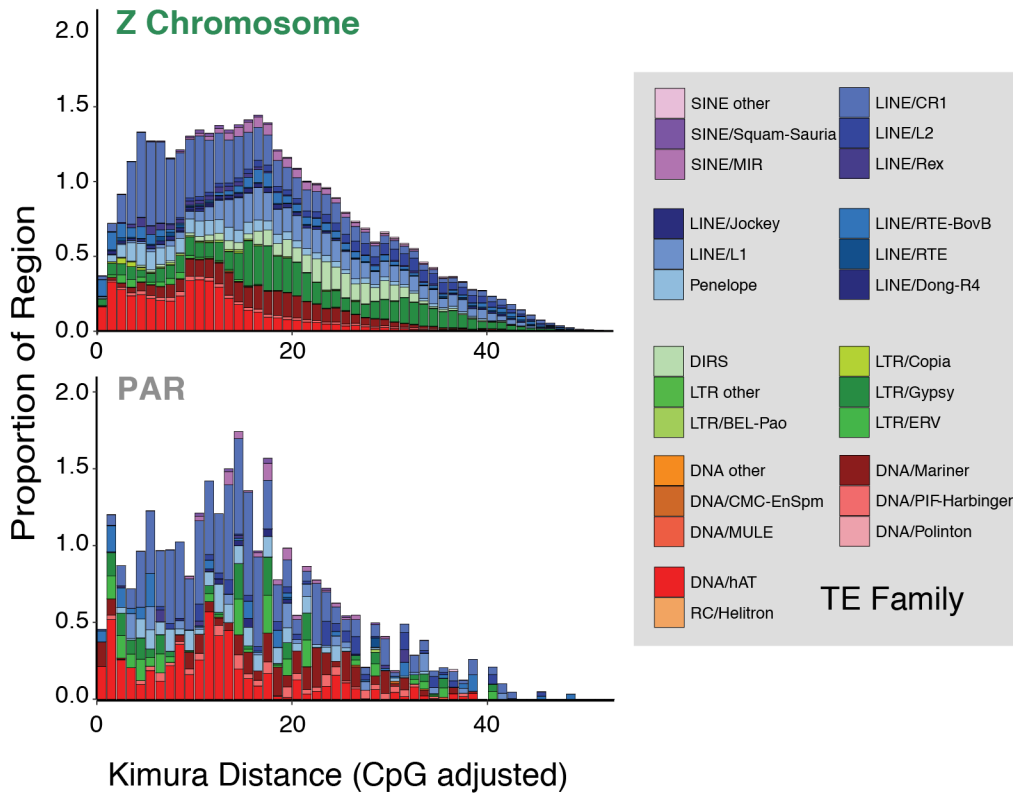

836

837

838

839

**Supplemental Figure S9.** Comparative age distributions of proportions of transposable elements (TEs) across the Z Chromosome (upper) and the pseudoautosomal region (PAR; lower) of the rattlesnake Z Chromosome. TE families contributing to proportions in each region at each age are shown at the right.

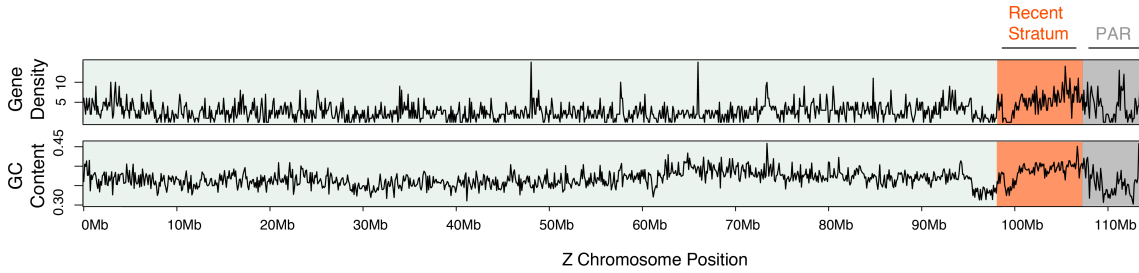

840

841 **Supplemental Figure S10.** 100 kb windowed scans of gene density (measured as number of genes per  
 842 window) and GC content (i.e., proportion of GC bases within each window) across the Z Chromosome of  
 843 the prairie rattlesnake. The regions on the Z correspond to those demarcated in Fig. 2 in the main text.

844

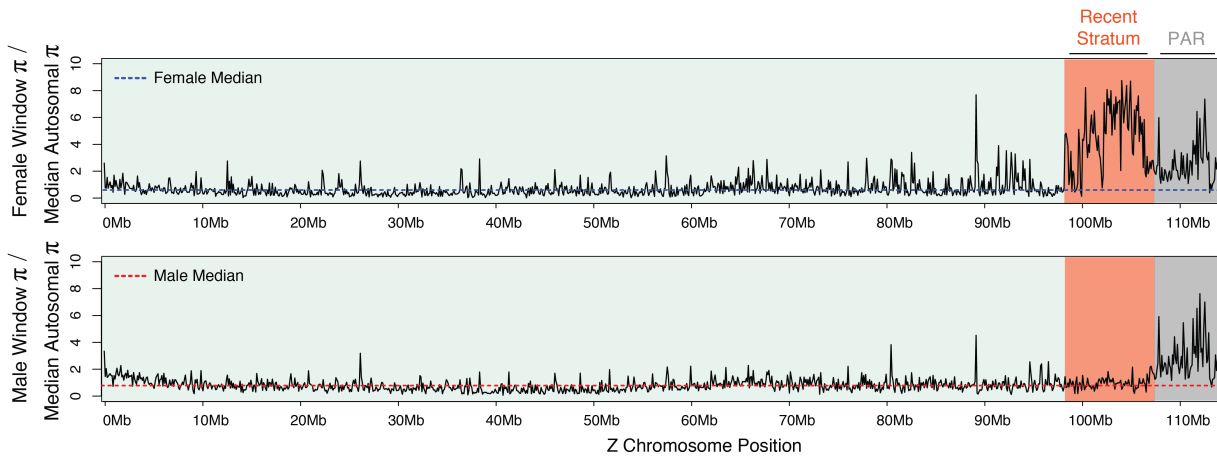

845

846 **Supplemental Figure S11.** 100 kb windowed scans of nucleotide diversity ( $\pi$ ) for each sex across the Z  
 847 Chromosome of the Prairie Rattlesnake. The regions on the Z correspond to those demarcated in Fig. 2 in  
 848 the main text. Blue and red dashed lines correspond to median female and male values, respectively.

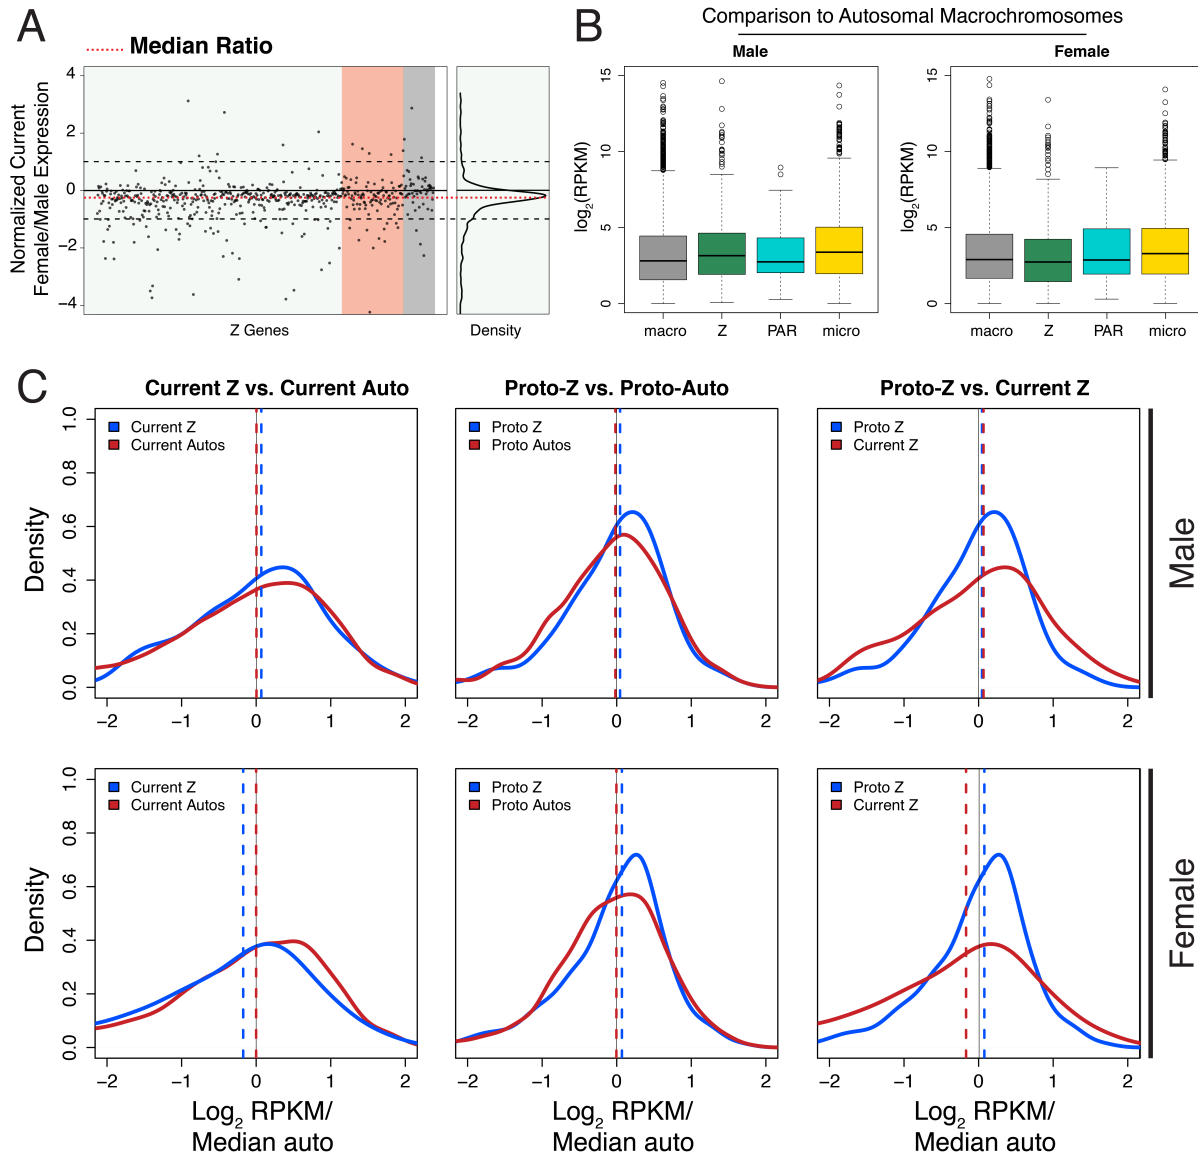

849

850 **Supplemental Figure S12.** Patterns of liver gene expression in females and males across the Z  
 851 chromosome. (A)  $\log_2$  normalized female/male gene expression per gene (black dots) across the Z. The  
 852 red dashed line is the median ratio, and relative density is shown to the right. (B) Gene expression ( $\log_2$   
 853 RPKM) distributions for male and female across macrochromosomes, Z chromosome, the PAR, and  
 854 microchromosomes. (C) Density plots of current and inferred ancestral patterns of gene expression ( $\log_2$   
 855 RPKM) in male and female, respectively. Dashed lines represent the median of each distribution.

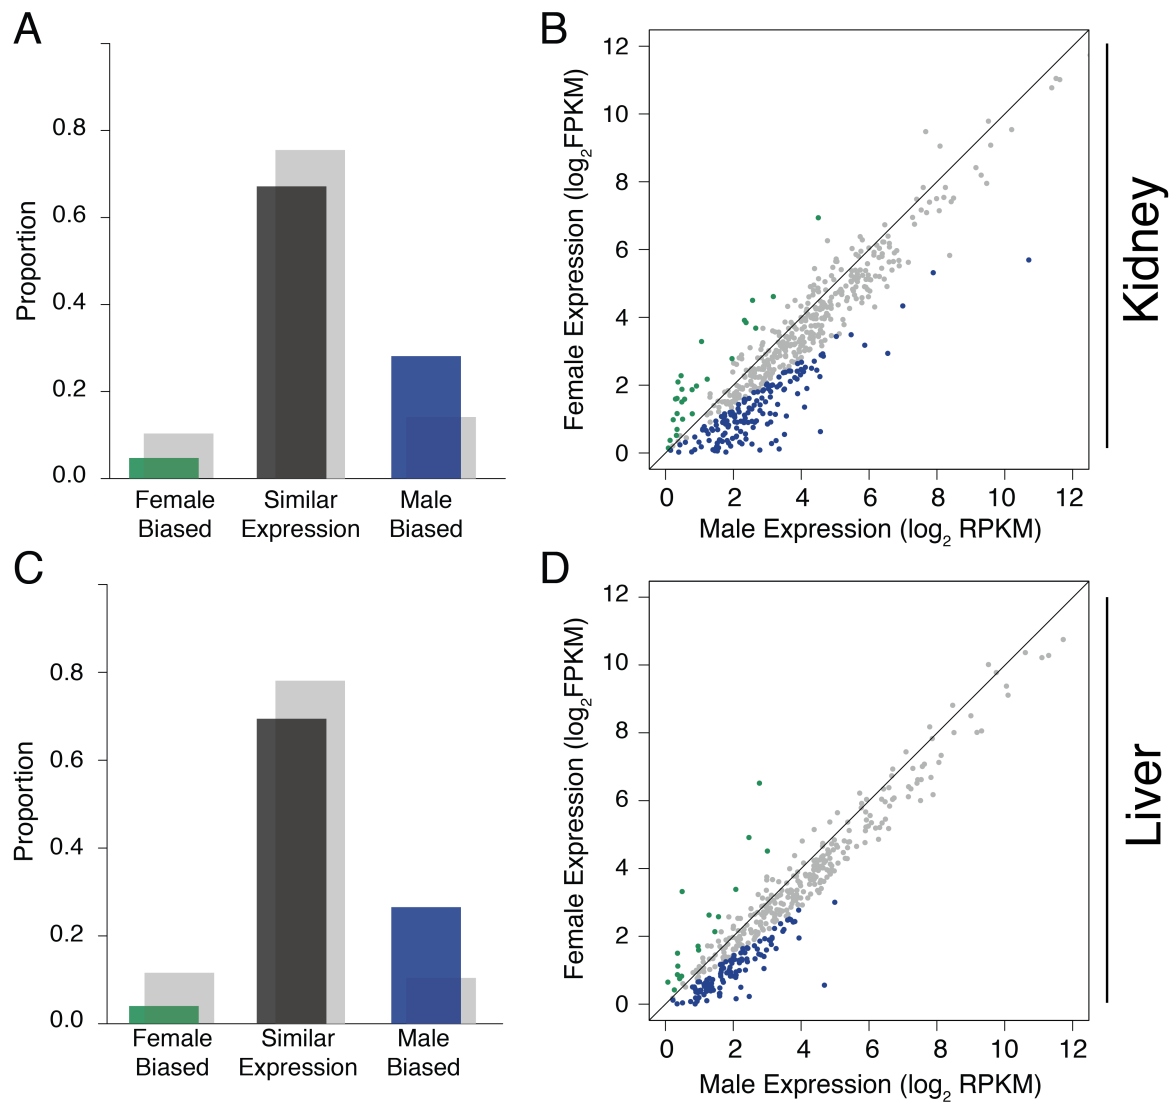

856

857 **Supplemental Figure S13.** Proportions of genes on the Z that exhibit female-biased (i.e.,  $\log_2$   
 858 female/male RPKM  $> 0.5$ ; green bars), unbiased (dark grey bars), and male-biased (i.e.,  $\log_2$  female/male  
 859 RPKM  $< -0.5$ ; blue bars) expression in the kidney (A) and liver (C). Light grey bars in the background  
 860 represent proportions of autosomal genes meeting the same criteria. Scatterplots of male versus female  
 861 gene expression ( $\log_2$  RPKM), with points showing expression of male-biased (blue), unbiased (grey),  
 862 and female-biased (green) genes for kidney (B) and liver (D).



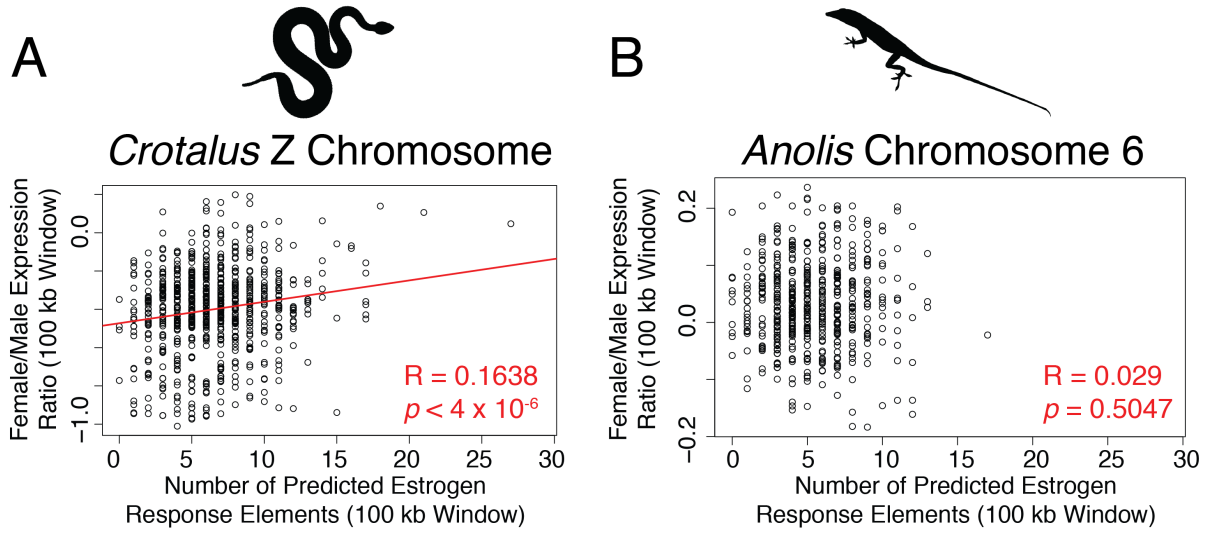

863

864 **Supplemental Figure S14.** Scatterplots of the number of predicted estrogen response elements versus the  
 865 ratio of  $\log_2$ (female/male) gene expression in 100 kb windows across the rattlesnake Z Chromosome (A)  
 866 and *Anolis* Chromosome 6 (B). The significant positive correlation between variables on the rattlesnake Z  
 867 is shown by the red line.

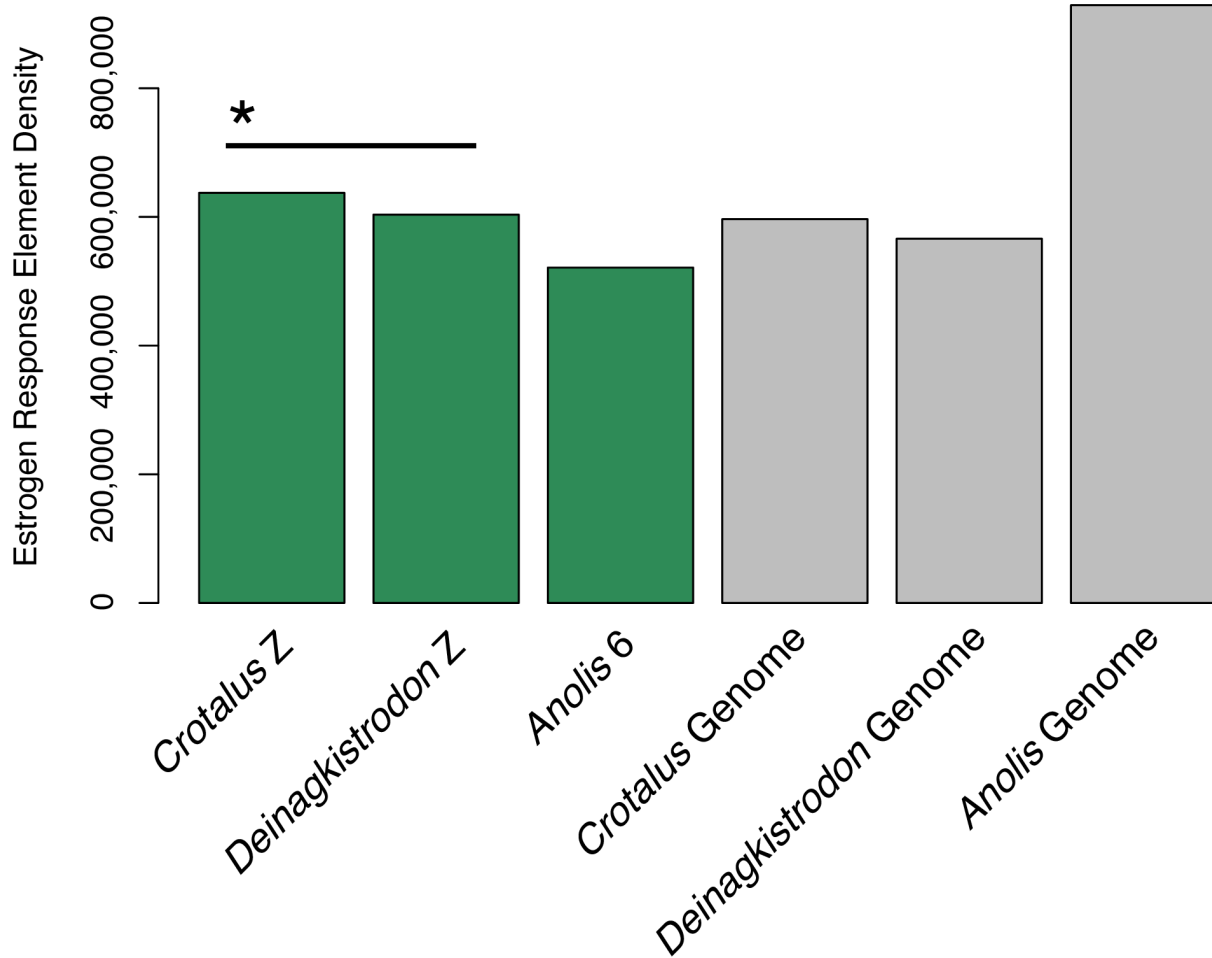

868

869 **Supplemental Figure S15.** Density of estrogen response elements (EREs) across the genomes of  
 870 squamate species. Density in Z-linked regions of the Prairie Rattlesnake (*Crotalus*) and Five Pace Viper  
 871 (*Deinagkistrodon*) and the syntenic Anole lizard (*Anolis*) Chromosome 6 regions are depicted in green,  
 872 and the genomic background for each species is shown in grey bars. The black bar and asterisk depict that  
 873 EREs are enriched on the pitviper Z Chromosome relative to the homologous autosome in *Anolis*  
 874 (Chromosome 6).

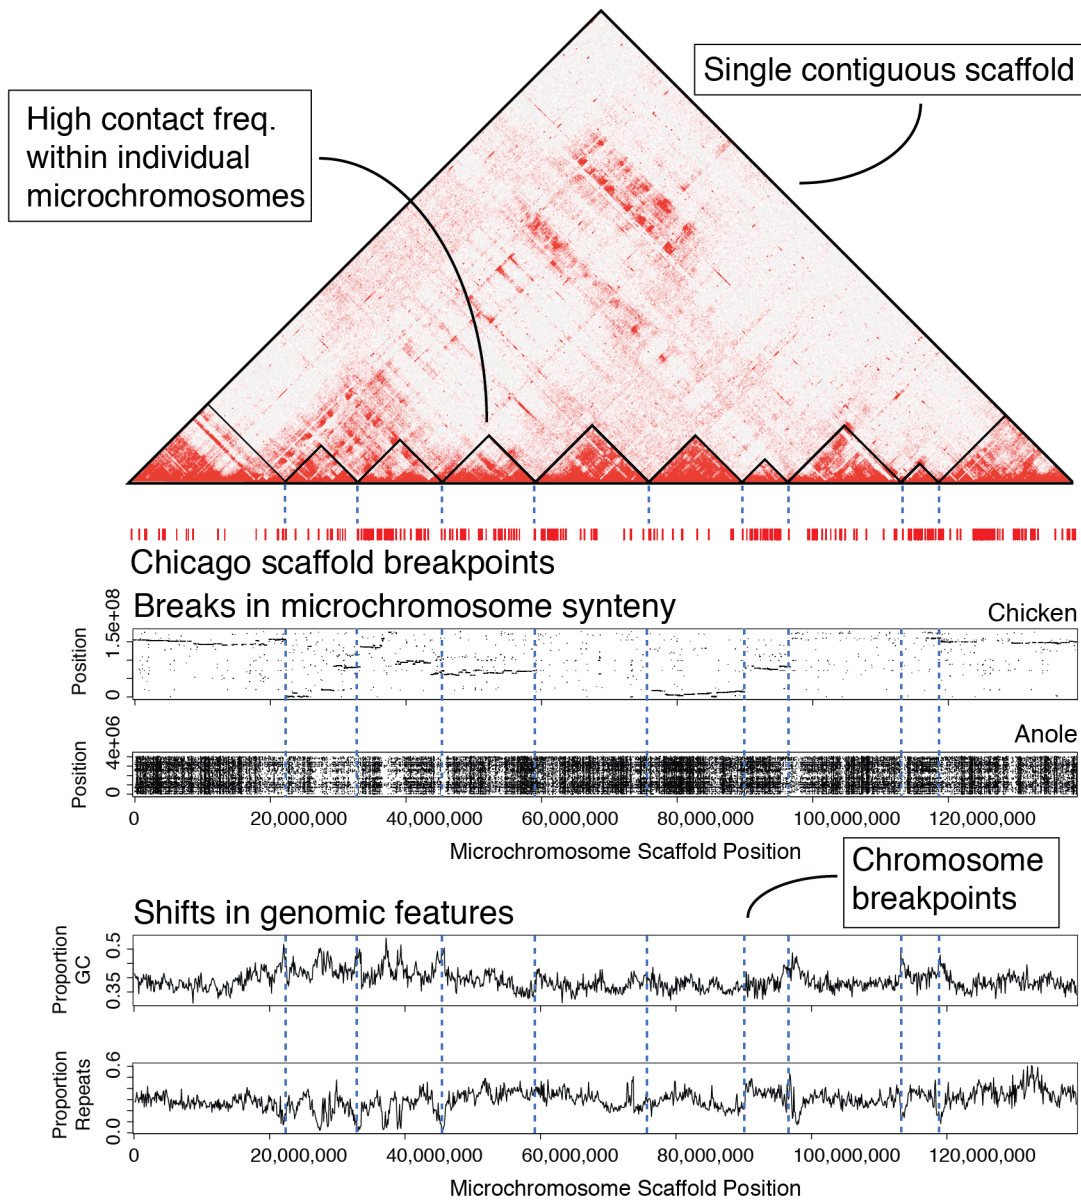

875  
 876 **Supplemental Figure S16.** Schematic of the initial misassembled microchromosome scaffold. The  
 877 heatmap panel at the top depicts the high frequency intrachromosomal contacts within individuals  
 878 microchromosomes, and black triangles depict boundaries between microchromosomes. Breakpoints  
 879 between Chicago scaffolds used as initial microchromosome breakpoint hypotheses are shown as red  
 880 dashes below the Hi-C heatmap. The middle two panels show synteny alignments between rattlesnake,  
 881 chicken, and anole microchromosomes. The bottom two panels show windowed GC and repeat content  
 882 across microchromosomes. Blue dashed lines in the lower panels show breakpoints between individual  
 883 microchromosomes.

884

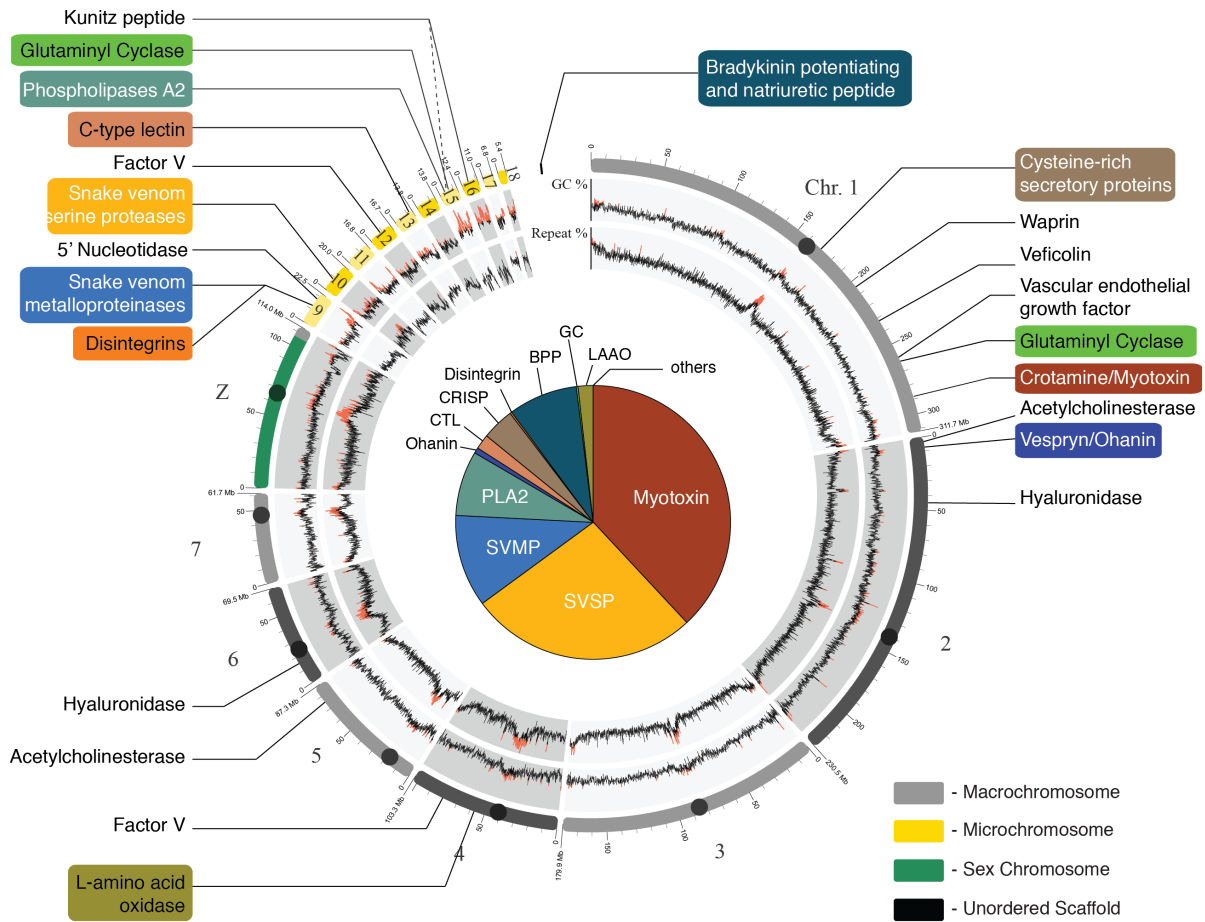

885

886

887 **Supplemental Figure S17.** Chromosomal locations of snake venom gene families in the prairie  
 888 rattlesnake. The pie chart in the center depicts the relative abundance of venom families in the prairie  
 889 rattlesnake proteome. Chromosomal ideograms and windowed scans of GC content (%) and repeat  
 890 content (%) correspond to those described in Fig. 1 in the main text).

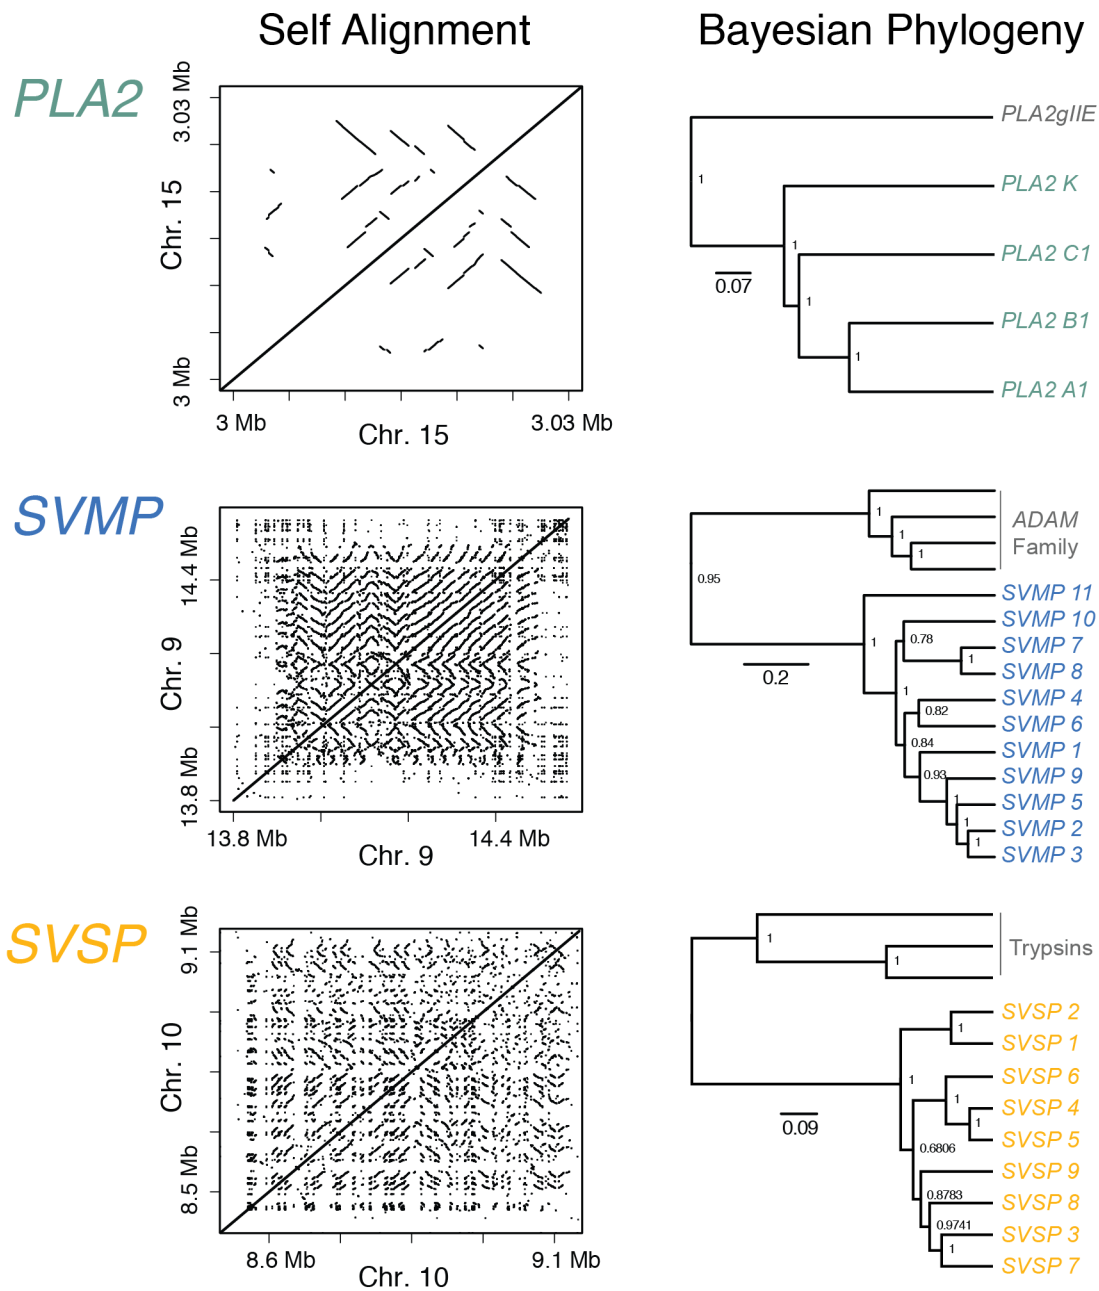

891

892 **Supplemental Figure S18.** Regional self alignment of phospholipase A2 (*PLA2*), snake venom  
 893 metalloproteinase (*SVMP*), and serine proteinase (*SVSP*) venom gene clusters (left). Parallel and  
 894 perpendicular lines off of the central diagonal line indicate segmental duplications. Bayesian phylogenetic  
 895 tree estimates for each of the three gene families constructed based on protein alignments (right), with  
 896 venom gene paralogs shown in color, and non-venom paralogs in grey. Values at nodes represent  
 897 posterior probabilities.

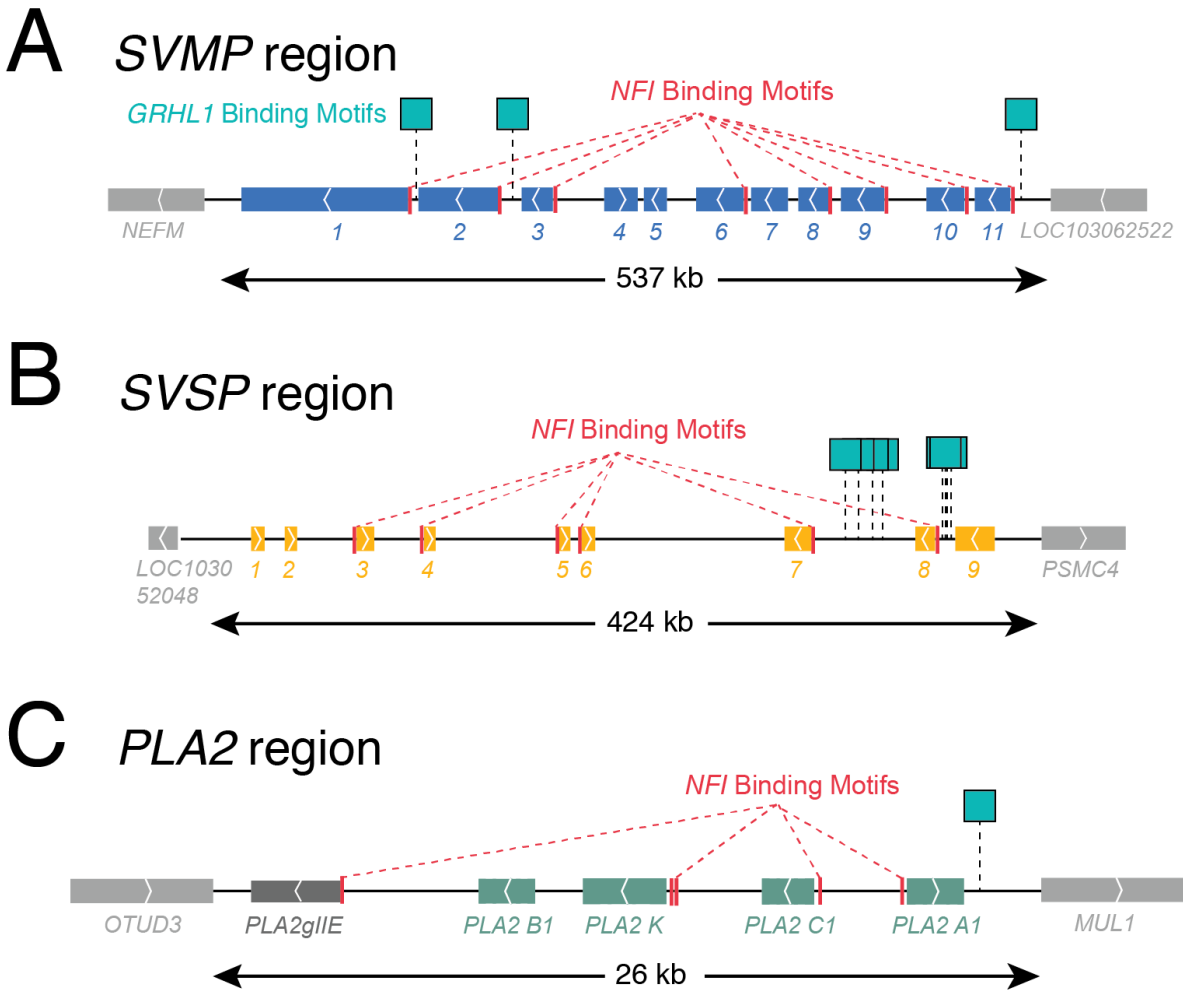

898

899 **Supplemental Figure S19.** Structure of annotated *SVMP* (A), *SVSP* (B), and *PLA2* (C) venom gene  
 900 clusters in the prairie rattlesnake genome. Strandedness (i.e., +/-) of genes is summarized by arrows in the  
 901 center of each gene. The length of each cluster is shown at the bottom of each panel. Non-venom genes  
 902 flanking each cluster are shown in grey. In the *PLA2* region, *PLA2gIIE* (non-toxin) is depicted in dark  
 903 grey. Predicted *NFI* transcription factor binding sites within the 1 kb upstream region of venom genes are  
 904 shown in red, and locations of predicted *GRHL1* binding sites between genes are shown as turquoise  
 905 squares.

Classification or Known Function

- RNA polymerase II core promoter binding
- Unfolded protein response
- Glandular epithelium

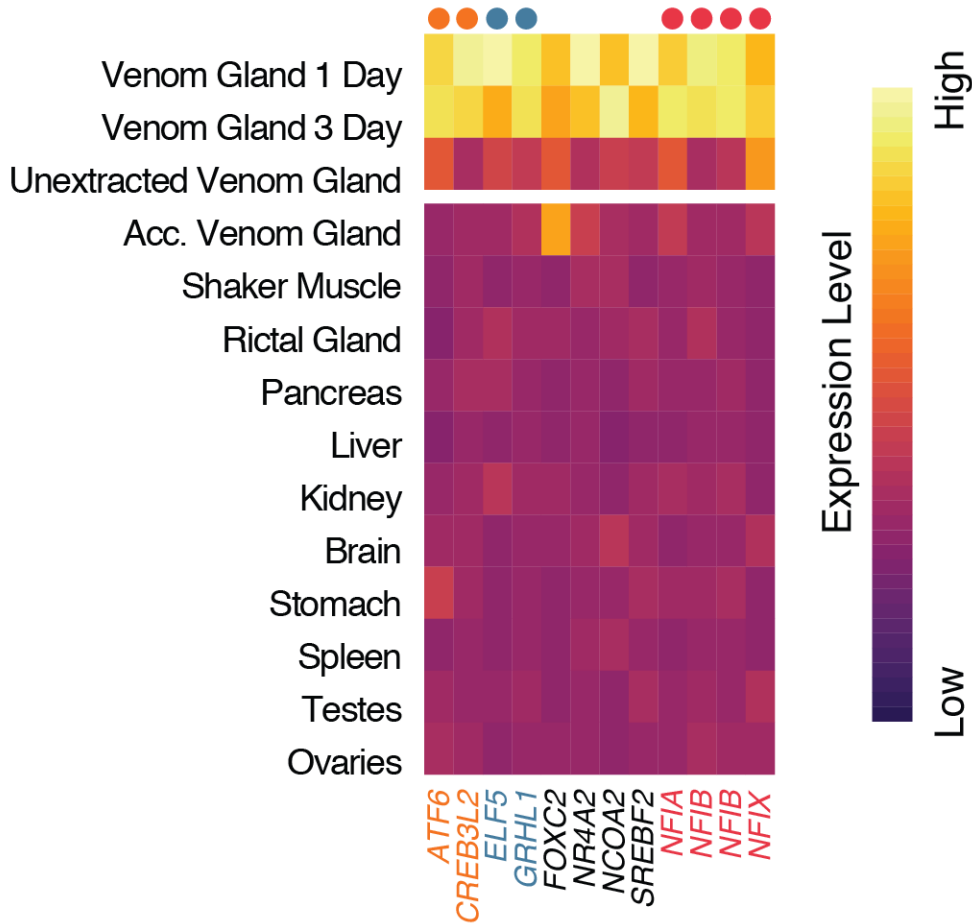

906

907

908

909

**Supplemental Figure S20.** Gene expression across tissues of 12 transcription factors (TFs) significantly upregulated in the venom gland. Broad classifications of known TF functions are annotated at the top of each gene, where applicable.

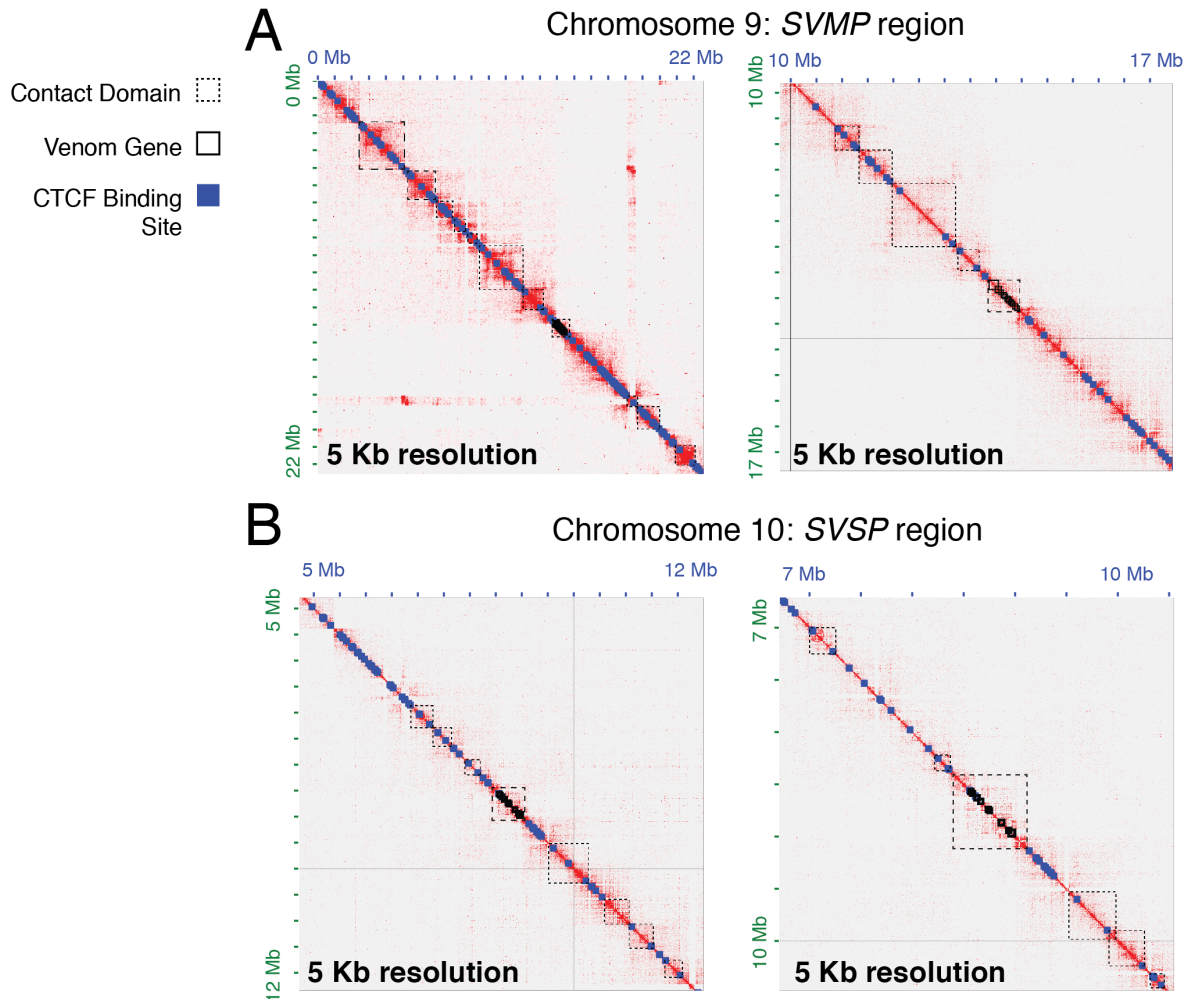

910

911 **Supplemental Figure S21.** Zoomed out Hi-C heatmaps of the *SVMP* (A) and *SVSP* (B) venom gene  
 912 regions at two scales (left and right) on microchromosomes, depicting chromatin contact domain  
 913 structure. Inferred contact domains are represented by dashed black boxes, venom genes in each venom  
 914 gene region are depicted by solid black boxes, and predicted *CTCF* binding sites are represented by blue  
 915 squares. Zoomed in versions of these schematics are presented in Fig. 4 in the main text.
